# Supplementary material for: Large-scale docking predicts that sORF-encoded peptides may function through protein-peptide interactions in Arabidopsis thaliana
Source: PubMed Central journal article supplement (PMC6188750; doi:10.1371/journal.pone.0205179), 2018-10-15
Supplement: pone.0205179.s005.pdf [file pone.0205179.s005.pdf]

| Ligand     | SIP                | PDB_match | PDB Chain | Raw <i>p</i> -values (PepSite2) | BH correction (FDR=0.25) |
|------------|--------------------|-----------|-----------|---------------------------------|--------------------------|
| QGQVT      | BIP38_4/OSIP43_4   | 5ECP      | F         | 0.0000067                       | 0.043062533              |
| FNRP       | BIP154_5/OSIP145_5 | 2O01      | A         | 0.0000355                       | 0.043062533              |
| SFAQF      | BIP171_6/OSIP158_6 | 5KSD      | B         | 0.0000550                       | 0.043062533              |
| KNPHQFL    | BIP232_2/OSIP232_2 | 5KSD      | B         | 0.0000595                       | 0.043062533              |
| ELLQQQRF   | BIP243_5/OSIP243_5 | 5GIJ      | B         | 0.0000674                       | 0.043062533              |
| WLVTGQT    | OSIP166_1          | 5ECK      | A         | 0.0000794                       | 0.043062533              |
| WLGP       | OSIP168_1          | 4PUT      | A         | 0.0000907                       | 0.043062533              |
| LGRIPG     | BIP47_6            | 3FY4      | B         | 0.0001067                       | 0.043062533              |
| HPFLVCWVSS | BIP47_6            | 3FY4      | A         | 0.0001085                       | 0.043062533              |
| NNGPNPTVSV | OSIP164_1          | 4KA7      | A         | 0.0001091                       | 0.043062533              |
| SAQPQELLPQ | BIP242_4/OSIP242_4 | 2VTB      | F         | 0.0001209                       | 0.043062533              |
| SISKACERIP | OSIP4_4            | 2Q4X      | B         | 0.0001221                       | 0.043062533              |
| TLSLVAFYFA | BIP232_1/OSIP232_1 | 2WSE      | B         | 0.0001258                       | 0.043062533              |
| HCSPNLNIVH | BIP244_8/OSIP244_8 | 3FY4      | B         | 0.0001346                       | 0.043062533              |
| YPVLDAVEGA | BIP47_6            | 3FY4      | C         | 0.0001355                       | 0.043062533              |
| QNQIKEYFIS | BIP244_8/OSIP244_8 | 3FY4      | A         | 0.0001362                       | 0.043062533              |
| MGPFSGPSEV | OSIP168_1          | 4KA7      | A         | 0.0001385                       | 0.043062533              |
| WSMFHGYNST | BIP244_4/OSIP244_4 | 2WSC      | B         | 0.0001406                       | 0.043062533              |
| WIHICMRRET | BIP38_4/OSIP43_4   | 5ECM      | B         | 0.0001497                       | 0.043062533              |
| IGFGMKASPT | BIP52_1            | 3FY4      | C         | 0.0001561                       | 0.043062533              |
| DSTNICARGS | OSIP4_4            | 2Q4X      | B         | 0.0001653                       | 0.043062533              |
| IHHPFRRCLF | BIP216_1/OSIP216_1 | 3FY4      | A         | 0.0001842                       | 0.043062533              |
| RSAVATWRQL | BIP232_1/OSIP232_1 | 2O01      | B         | 0.0001937                       | 0.043062533              |
| SSPARPQHLL | BIP223_6/OSIP223_6 | 4LIX      | A         | 0.0002093                       | 0.043062533              |
| APWILTVAAS | OSIP164_1          | 4KA7      | A         | 0.0002172                       | 0.043062533              |
| YTFICCTISI | BIP244_4/OSIP244_4 | 2WSE      | B         | 0.0002213                       | 0.043062533              |
| VYRQMAQFTL | BIP90_3            | 4E2S      | L         | 0.0002269                       | 0.043062533              |
| SILFFPLCKF | BIP171_6/OSIP158_6 | 5KSD      | B         | 0.0002515                       | 0.043062533              |
| ALRIPKLYLV | OSIP85_3           | 2WSE      | B         | 0.0002528                       | 0.043062533              |
| YKQSFACLAS | BIP142_3/OSIP134_3 | 2VTB      | E         | 0.0002532                       | 0.043062533              |
| NNKAKISIVC | BIP216_1/OSIP216_1 | 3FY4      | C         | 0.0002677                       | 0.043062533              |
| SLQP       | BIP213_1/OSIP213_1 | 5LAL      | B         | 0.0002713                       | 0.043062533              |
| SKNHR      | BIP244_4/OSIP244_4 | 2WSF      | B         | 0.0002800                       | 0.043062533              |
| VMTNGNSSNR | OSIP4_4            | 2Q4X      | B         | 0.0002956                       | 0.043062533              |
| DISHMPYRFK | BIP243_5/OSIP243_5 | 5GR9      | B         | 0.0002976                       | 0.043062533              |
| PKTHLI     | BIP149_5/OSIP141_5 | 4LIX      | A         | 0.0003328                       | 0.043062533              |
| SSDPVNIWKE | BIP235_4/OSIP235_4 | 5GQR      | B         | 0.0003576                       | 0.043062533              |
| EQYWLPLLVD | OSIP51_2           | 5ECN      | A         | 0.0003631                       | 0.043062533              |
| HHRTRAGRTF | OSIP51_2           | 5ECK      | A         | 0.0003680                       | 0.043062533              |
| INKRMWLIKL | BIP38_4/OSIP43_4   | 5ECP      | F         | 0.0003692                       | 0.043062533              |
| CSNSHQW    | BIP230_5/OSIP230_5 | 5ECK      | A         | 0.0003772                       | 0.043062533              |
| FLYFIFFSFS | BIP140_6/OSIP130_6 | 2VTB      | E         | 0.0003950                       | 0.043062533              |
| KAYDRVRKKV | BIP52_1            | 3FY4      | C         | 0.0004003                       | 0.043062533              |
| GSFFKLVESR | BIP139_6           | 4PUT      | A         | 0.0004064                       | 0.043062533              |
| DLASDNRNPL | BIP73_5/OSIP75_5   | 2VTB      | E         | 0.0004161                       | 0.043062533              |
| PFAQ       | BIP22_1/OSIP25_1   | 3OGK      | L         | 0.0004249                       | 0.043062533              |

| Ligand      | SIP                | PDB_match | PDB Chain | Raw <i>p</i> -values (PepSite2) | BH correction (FDR=0.25) |
|-------------|--------------------|-----------|-----------|---------------------------------|--------------------------|
| KAPD        | BIP180_2/OSIP167_2 | 3T33      | A         | 0.0004302                       | 0.043062533              |
| TFLG        | BIP224_3/OSIP224_3 | 2Q3O      | B         | 0.0004323                       | 0.043062533              |
| TLTTEPTMVI  | BIP243_5/OSIP243_5 | 5GQR      | B         | 0.0004362                       | 0.043062533              |
| WITYLRRVMD  | BIP244_8/OSIP244_8 | 3FY4      | C         | 0.0004377                       | 0.043062533              |
| APCPSLLHKL  | BIP209_3/OSIP209_3 | 5IYX      | A         | 0.0004596                       | 0.043062533              |
| FNHS        | BIP93_2/OSIP89_2   | 4KA8      | A         | 0.0004653                       | 0.043062533              |
| NFHLPQP     | BIP171_2/OSIP158_2 | 2Q4E      | B         | 0.0004972                       | 0.043062533              |
| HTYKLFCKNI  | BIP40_1/OSIP44_1   | 2VTB      | E         | 0.0005154                       | 0.043062533              |
| VQYILSTHQH  | BIP230_5/OSIP230_5 | 5ECK      | A         | 0.0005673                       | 0.043062533              |
| YFSMQVFYEF  | BIP243_5/OSIP243_5 | 5GIJ      | B         | 0.0005711                       | 0.043062533              |
| KGILTVQSAG  | OSIP164_1          | 4KA8      | A         | 0.0005740                       | 0.043062533              |
| QYRVSDFALP  | BIP89_6            | 5I32      | A         | 0.0006018                       | 0.043062533              |
| LDRISKAQSV  | BIP139_6           | 4PUT      | A         | 0.0006089                       | 0.043062533              |
| RYCMRLMMLN  | BIP86_6            | 3PYA      | A         | 0.0006120                       | 0.043062533              |
| VPCSINYGLV  | BIP242_4/OSIP242_4 | 2VTB      | A         | 0.0006601                       | 0.043062533              |
| VRGNNVTHV   | OSIP168_1          | 4KA7      | A         | 0.0006669                       | 0.043062533              |
| FSYQLSDFVC  | BIP139_6           | 4PUT      | A         | 0.0007097                       | 0.043062533              |
| TTQALHLTIL  | OSIP166_1          | 5ECK      | A         | 0.0007109                       | 0.043062533              |
| ILSHLQALPH  | BIP90_3            | 4E2S      | L         | 0.0007477                       | 0.043072353              |
| EQVHSL      | BIP209_3/OSIP209_3 | 5IYX      | A         | 0.0007776                       | 0.043103984              |
| LFLRFYNLNS  | BIP154_5/OSIP145_5 | 2O01      | A         | 0.0008134                       | 0.043167944              |
| ISCGHKSHIF  | BIP230_5/OSIP230_5 | 5ECK      | A         | 0.0008148                       | 0.043167944              |
| PNGREYIFYR  | BIP231_3/OSIP231_3 | 3NME      | B         | 0.0008441                       | 0.04324374               |
| GRECLSQRIM  | BIP208_2/OSIP208_2 | 2XQR      | K         | 0.0008556                       | 0.04328148               |
| AFNSHFLNQS  | BIP231_4/OSIP231_4 | 4IH4      | A         | 0.0008715                       | 0.043322345              |
| IAIGAFHAMA  | OSIP164_1          | 4KA8      | A         | 0.0009465                       | 0.043548975              |
| DKVQRRGTVC  | BIP59_6            | 2XQR      | A         | 0.0009545                       | 0.043576299              |
| LNKICIFFST  | BIP154_5/OSIP145_5 | 2O01      | A         | 0.0009756                       | 0.043653769              |
| SFYIDLGPHS  | BIP93_2/OSIP89_2   | 4KA7      | A         | 0.0009872                       | 0.043705064              |
| KKPFVAFCEP  | OSIP51_4           | 2FGE      | A         | 0.0010040                       | 0.043756402              |
| KHFQFHYSKIS | BIP213_1/OSIP213_1 | 5LAL      | B         | 0.0010060                       | 0.043763962              |
| QIKPQRT     | BIP89_4            | 5GZZ      | C         | 0.0010220                       | 0.043822401              |
| SSRSNQNNT   | BIP240_6/OSIP240_6 | 5ECK      | A         | 0.0010260                       | 0.04384527               |
| HTQRQQKSNI  | BIP222_1/OSIP222_1 | 5KOR      | A         | 0.0011030                       | 0.044133164              |
| VQVGKYLPE   | BIP31_5            | 2FGE      | A         | 0.0011450                       | 0.044315625              |
| LCSEIQPTTS  | BIP224_3/OSIP224_3 | 2Q3O      | A         | 0.0011880                       | 0.044487676              |
| NINKSKYSLS  | OSIP4_4            | 2Q4X      | B         | 0.0012390                       | 0.044724416              |
| LLFLSFYFSC  | BIP140_6/OSIP130_6 | 2VTB      | B         | 0.0012600                       | 0.044804434              |
| VPPSQPSPCH  | BIP38_2/OSIP43_2   | 3CQN      | B         | 0.0013030                       | 0.044975634              |
| KKAYGKIDMH  | BIP93_2/OSIP89_2   | 4KA7      | A         | 0.0013570                       | 0.045209824              |
| RFFQFARKQL  | BIP240_7/OSIP240_7 | 1U1U      | A         | 0.0013590                       | 0.045209824              |
| NFHVTKDTSC  | BIP116_3           | 2O01      | A         | 0.0013640                       | 0.045245995              |
| FYIPSNFVYY  | BIP229_2/OSIP229_2 | 2Q3O      | B         | 0.0013750                       | 0.045275017              |
| GSRFHECSS   | BIP232_1/OSIP232_1 | 2WSE      | B         | 0.0014120                       | 0.045504712              |
| VSLVTIPNNN  | OSIP108_3          | 5HAD      | A         | 0.0014660                       | 0.0457405                |
| TQSVPTCKS   | BIP231_2/OSIP231_2 | 2P1N      | B         | 0.0014710                       | 0.045756756              |

| Ligand     | SIP                | PDB_match | PDB Chain | Raw <i>p</i> -values (PepSite2) | BH correction (FDR=0.25) |
|------------|--------------------|-----------|-----------|---------------------------------|--------------------------|
| RRKSTNQMGL | BIP210_2/OSIP210_2 | 4TNM      | A         | 0.0015520                       | 0.046163729              |
| PLSTFSLFFF | BIP180_1/OSIP167_1 | 5HAD      | A         | 0.0015630                       | 0.046219798              |
| MHTHFSPSAC | OSIP108_3          | 5HAD      | A         | 0.0016030                       | 0.046427251              |
| INGWIHELEL | BIP140_6/OSIP130_6 | 2VTB      | B         | 0.0016380                       | 0.046580018              |
| TFEQYWLPLL | OSIP51_2           | 4A0H      | A         | 0.0016520                       | 0.046648252              |
| LAEDTFGEIS | BIP142_3/OSIP134_3 | 2VTB      | D         | 0.0016740                       | 0.046760405              |
| YSHEAAFPSA | BIP231_1/OSIP231_1 | 4TNM      | A         | 0.0016970                       | 0.046881324              |
| RPGLRPNGPS | OSIP77_2           | 1WE9      | A         | 0.0016970                       | 0.046881324              |
| SIGYLHFKNR | BIP149_5/OSIP141_5 | 4LIX      | A         | 0.0017520                       | 0.047145635              |
| GMLFNRVKSH | BIP86_1            | 4LIX      | A         | 0.0018840                       | 0.047780464              |
| RRCLFCFFPL | BIP216_1/OSIP216_1 | 1U3C      | A         | 0.0018900                       | 0.047812348              |
| IVTLFLI    | BIP231_2/OSIP231_2 | 2P1N      | B         | 0.0018980                       | 0.047862954              |
| PLSQKKENHF | BIP232_2/OSIP232_2 | 5KSD      | A         | 0.0019120                       | 0.047922529              |
| KAWSSRHTLL | BIP73_5/OSIP75_5   | 2VTB      | A         | 0.0019290                       | 0.048011395              |
| AILDAAVIPA | BIP97_6            | 5KOR      | C         | 0.0019610                       | 0.048169944              |
| PTIVPDCLSK | BIP235_4/OSIP235_4 | 5GIJ      | B         | 0.0019780                       | 0.048277539              |
| NKKLIWPSWS | BIP180_2/OSIP167_2 | 3T33      | A         | 0.0020080                       | 0.048429206              |
| NMLPWNATRI | BIP89_2            | 4EQ4      | A         | 0.0020630                       | 0.048706951              |
| LRSMAACFAY | BIP89_6            | 5I32      | A         | 0.0020630                       | 0.048706951              |
| VKLVDRRHVV | BIP139_6           | 4PUT      | A         | 0.0021150                       | 0.048965712              |
| LLPSLAQRET | BIP3_1             | 4BQF      | B         | 0.0021510                       | 0.049151074              |
| KRTVKGHMK  | BIP155_6           | 4XK8      | 4         | 0.0021660                       | 0.049229503              |
| TKHCDQIYQD | BIP201_1/OSIP201_1 | 3T33      | A         | 0.0022060                       | 0.049426819              |
| TTDKLIPEHM | BIP154_1/OSIP145_1 | 4DNU      | A         | 0.0022100                       | 0.049456892              |
| PLVIAEMR   | BIP208_2/OSIP208_2 | 2XQR      | A         | 0.0022550                       | 0.049686797              |
| FVFLVLVLL  | BIP242_4/OSIP242_4 | 2VTB      | B         | 0.0022930                       | 0.049862601              |
| PLDFHRVMMV | BIP208_5/OSIP208_5 | 1Q45      | B         | 0.0023240                       | 0.050037913              |
| SHACTHNTY  | OSIP68_6           | 3R0Q      | G         | 0.0023360                       | 0.050091036              |
| LNVCNILLMY | BIP180_1/OSIP167_1 | 5HAD      | A         | 0.0024900                       | 0.050872606              |
| ILRRICILIT | BIP231_6/OSIP231_6 | 4A0G      | A         | 0.0025030                       | 0.050945665              |
| VGIVPRQKKV | OSIP70_3           | 1XQ1      | A         | 0.0025320                       | 0.051075564              |
| NPSITLRRYV | BIP244_9/OSIP244_9 | 1XJ5      | C         | 0.0025410                       | 0.051123089              |
| IDRWGRVLLQ | BIP88_2/OSIP84_2   | 2Q3O      | A         | 0.0025620                       | 0.051213665              |
| KTSTRFCLIP | OSIP86_3           | 5DQR      | A         | 0.0025930                       | 0.051370006              |
| WIIGLRDKH  | BIP116_3           | 2O01      | A         | 0.0026140                       | 0.051462632              |
| FSFLNFQNWD | BIP228_1/OSIP228_1 | 2G0Q      | A         | 0.0026190                       | 0.051496988              |
| VWINQILEQH | BIP214_1/OSIP214_1 | 1YHY      | A         | 0.0026680                       | 0.051725656              |
| MWLKLGQGV  | BIP38_4/OSIP43_4   | 1XQ1      | A         | 0.0026720                       | 0.051737927              |
| KDLTFFPPKN | BIP0_3             | 3RIZ      | A         | 0.0027270                       | 0.052016522              |
| FPPSWIHHPF | BIP216_1/OSIP216_1 | 1U3C      | A         | 0.0027270                       | 0.052016522              |
| NSSSSKPLSF | BIP224_3/OSIP224_3 | 2Q3O      | A         | 0.0027680                       | 0.052205995              |
| TQTKLKCNTK | BIP222_1/OSIP222_1 | 5KOE      | A         | 0.0027960                       | 0.052317562              |
| RFPIASAFSQ | BIP51_6            | 2I9Y      | A         | 0.0029210                       | 0.052894753              |
| EREAYKEPCA | BIP231_1/OSIP231_1 | 4TNM      | A         | 0.0029310                       | 0.052951034              |
| SNSHQW     | BIP230_5/OSIP230_5 | 2Q42      | A         | 0.0029320                       | 0.052965514              |
| DRSEIQFVVG | BIP59_6            | 2XQR      | C         | 0.0030620                       | 0.053585423              |

| Ligand     | SIP                | PDB_match | PDB Chain | Raw <i>p</i> -values (PepSite2) | BH correction (FDR=0.25) |
|------------|--------------------|-----------|-----------|---------------------------------|--------------------------|
| IFWWKRIRDN | BIP231_6/OSIP231_6 | 4A0G      | A         | 0.0030770                       | 0.053638742              |
| GTPSEKEKLF | BIP208_5/OSIP208_5 | 2Q3O      | A         | 0.0031080                       | 0.053773093              |
| TFQRNYECAS | BIP236_3/OSIP236_3 | 4N7Q      | A         | 0.0031820                       | 0.054111335              |
| RRCVREVNDR | BIP142_3/OSIP134_3 | 2VTB      | A         | 0.0032090                       | 0.054222527              |
| NKIYNFKILI | OSIP108_3          | 5HAD      | A         | 0.0032360                       | 0.054348325              |
| GGDRGLYSGR | BIP140_6/OSIP130_6 | 2VTB      | B         | 0.0032530                       | 0.054441262              |
| WLKSSVITYP | BIP209_2/OSIP209_2 | 3R0Q      | G         | 0.0033190                       | 0.054743787              |
| SDLQKDSWVQ | BIP90_3            | 4E2Q      | C         | 0.0033350                       | 0.05480722               |
| SQYYSPNHGY | OSIP52_3           | 2FGE      | A         | 0.0033580                       | 0.054907154              |
| FLLEPPYLDR | BIP31_5            | 2FGE      | A         | 0.0033810                       | 0.055019855              |
| SFPNSNSGKV | BIP31_5            | 2FGE      | B         | 0.0034090                       | 0.055150462              |
| SFPNSNSGKV | BIP31_5            | 2FGE      | A         | 0.0034090                       | 0.055150462              |
| PKPQNHVFR  | BIP9_3             | 3OGK      | D         | 0.0034090                       | 0.055150462              |
| RWCYPCRSSI | BIP223_3/OSIP223_3 | 3H7R      | A         | 0.0034490                       | 0.055332497              |
| SKPAAGTCSR | OSIP86_3           | 5DQR      | E         | 0.0034490                       | 0.055332497              |
| TISPFYEHNQ | BIP164_2           | 4Z63      | A         | 0.0034550                       | 0.055371644              |
| QLPFLITDSN | BIP22_1/OSIP25_1   | 3OGK      | F         | 0.0035550                       | 0.055820995              |
| TPLLSKQLHS | BIP245_4/OSIP245_4 | 5D79      | A         | 0.0036090                       | 0.056087942              |
| FNTQSVPTFC | BIP231_2/OSIP231_2 | 3OGK      | L         | 0.0037140                       | 0.056594733              |
| LGDHIARPRI | BIP88_2/OSIP84_2   | 1Q45      | B         | 0.0037510                       | 0.056772716              |
| EKEIMNCSGF | BIP228_1/OSIP228_1 | 2G0Q      | A         | 0.0038090                       | 0.057055449              |
| CFVCWWIGNE | BIP210_2/OSIP210_2 | 4TNM      | A         | 0.0038990                       | 0.057476199              |
| GIYLYNKCAF | OSIP68_6           | 3R0Q      | G         | 0.0039060                       | 0.057508502              |
| DHGLPFDTPA | BIP97_1            | 5E1J      | A         | 0.0040120                       | 0.057999618              |
| QSGDGARQ   | BIP26_4/OSIP30_4   | 1YBH      | A         | 0.0040250                       | 0.058056794              |
| VNPSRF     | OSIP99_1           | 1YDW      | B         | 0.0040280                       | 0.058088776              |
| VHHESSNPSN | BIP229_2/OSIP229_2 | 2Q3O      | A         | 0.0040530                       | 0.058190034              |
| FQQHKITRGH | BIP97_6            | 5KOR      | A         | 0.0040530                       | 0.058190034              |
| LCSIEPERPL | OSIP77_6           | 2P1N      | B         | 0.0040800                       | 0.058302086              |
| LLKQILTLVT | OSIP68_6           | 3R0Q      | G         | 0.0041140                       | 0.058441016              |
| RCFPCHPS   | BIP24_1            | 1RP0      | A         | 0.0042420                       | 0.059034087              |
| FLMFSYFWCC | BIP6_6/OSIP8_6     | 1U3D      | A         | 0.0042550                       | 0.059077753              |
| LSQRIMPLVI | BIP208_2/OSIP208_2 | 4L0Q      | A         | 0.0043190                       | 0.059352533              |
| MIGEVKR    | BIP88_2/OSIP84_2   | 2Q3O      | A         | 0.0043280                       | 0.059407385              |
| FFDDVKSRRL | BIP103_3           | 2XQR      | A         | 0.0043920                       | 0.059654394              |
| ISHLNRLPTR | BIP239_3/OSIP239_3 | 1U3D      | A         | 0.0043920                       | 0.059654394              |
| FRGWDWSEY  | BIP31_2            | 2WSC      | F         | 0.0044290                       | 0.059827545              |
| NHNTAPQSFS | BIP62_3/OSIP58_3   | 4RL5      | B         | 0.0044440                       | 0.059893749              |
| KELQNTLTYI | BIP201_1/OSIP201_1 | 3T33      | A         | 0.0044820                       | 0.060052748              |
| ALQNKLRGP  | BIP38_2/OSIP43_2   | 3CQR      | A         | 0.0044970                       | 0.060122348              |
| RSHHRTRAGR | OSIP51_2           | 4A0G      | A         | 0.0045120                       | 0.060185628              |
| GSESHVDATQ | BIP231_1/OSIP231_1 | 4TNM      | A         | 0.0045200                       | 0.060224296              |
| SRFVLLPGMR | OSIP70_3           | 1XQ1      | A         | 0.0045580                       | 0.060391891              |
| FAVEFQVRK  | BIP212_2/OSIP212_2 | 5D79      | B         | 0.0045630                       | 0.060419515              |
| VEQMSENRKG | BIP223_6/OSIP223_6 | 3PYA      | A         | 0.0045880                       | 0.060518657              |
| QFTCNMFC   | OSIP108_6          | 4IUT      | B         | 0.0046500                       | 0.060812072              |

| Ligand     | SIP                | PDB_match | PDB Chain | Raw <i>p</i> -values (PepSite2) | BH correction (FDR=0.25) |
|------------|--------------------|-----------|-----------|---------------------------------|--------------------------|
| NLEILEWIEI | BIP235_4/OSIP235_4 | 5GIJ      | B         | 0.0046660                       | 0.060891051              |
| VMSVSPSVVW | BIP237_2/OSIP237_2 | 1WH2      | A         | 0.0047450                       | 0.061247208              |
| LPLVSISSGA | BIP240_6/OSIP240_6 | 5ECK      | A         | 0.0047450                       | 0.061247208              |
| RLTELGQRTT | BIP31_5            | 2FGE      | B         | 0.0047450                       | 0.061247208              |
| SGLSNTALAR | BIP229_2/OSIP229_2 | 2Q3O      | B         | 0.0047530                       | 0.061280118              |
| QQERNREFLK | BIP201_1/OSIP201_1 | 3T33      | A         | 0.0047930                       | 0.061451001              |
| EAMISWLRV  | BIP101_6/OSIP98_6  | 4XK8      | 7         | 0.0048620                       | 0.06177667               |
| FFFLHK     | BIP91_2/OSIP88_2   | 4J0M      | B         | 0.0048940                       | 0.061934361              |
| LLTSYELSCV | BIP231_3/OSIP231_3 | 4PYH      | A         | 0.0049980                       | 0.062359661              |
| PVYRQMAQFT | BIP90_3            | 1T1H      | A         | 0.0050570                       | 0.062607232              |
| HSEKDRLRKN | BIP40_1/OSIP44_1   | 2VTB      | B         | 0.0051680                       | 0.063083211              |
| NTYLPIVSYR | BIP244_9/OSIP244_9 | 1XJ5      | C         | 0.0051770                       | 0.063126435              |
| RIFNFPRIK  | BIP44_5/OSIP49_5   | 4QEO      | A         | 0.0051770                       | 0.063126435              |
| PPPPPRFYVP | BIP161_4/OSIP147_4 | 5CTO      | C         | 0.0053000                       | 0.063655015              |
| SSSIQSGCFF | BIP106_4           | 4NFU      | B         | 0.0053980                       | 0.064069027              |
| PSPRYTSHSQ | BIP223_3/OSIP223_3 | 3H7R      | A         | 0.0054710                       | 0.064367463              |
| ILTWFGQAKS | BIP226_1/OSIP226_1 | 4Z63      | A         | 0.0055360                       | 0.064652478              |
| IQLMKYSFI  | BIP244_9/OSIP244_9 | 2Q41      | D         | 0.0055780                       | 0.064836238              |
| ISIVCFVCLK | BIP216_1/OSIP216_1 | 1U3C      | A         | 0.0056770                       | 0.065218571              |
| LNYNVQ     | BIP97_1            | 5E1J      | A         | 0.0058630                       | 0.065999611              |
| IKIANFDKVK | BIP97_6            | 5KOP      | B         | 0.0058800                       | 0.066060605              |
| RGEEQIFWCQ | BIP227_1/OSIP227_1 | 4O7G      | A         | 0.0059100                       | 0.066195474              |
| RRREERSQRK | BIP210_2/OSIP210_2 | 4TNM      | A         | 0.0059200                       | 0.066236813              |
| CGRGARVADM | OSIP86_3           | 5DQR      | E         | 0.0059790                       | 0.066476556              |
| FFFFLY     | BIP105_2           | 5FT9      | B         | 0.0061030                       | 0.066999648              |
| NLKHNTLE   | BIP222_1/OSIP222_1 | 5KOR      | A         | 0.0062250                       | 0.067472018              |
| NKLNPLSHSQ | BIP38_2/OSIP43_2   | 3CQR      | A         | 0.0062350                       | 0.067508689              |
| NHMHKLE    | BIP97_6            | 5KOP      | C         | 0.0064900                       | 0.06854416               |
| HGTIIKPNR  | BIP242_7/OSIP242_7 | 3OGK      | D         | 0.0065670                       | 0.068828196              |
| NFDKVKFQQH | BIP97_6            | 4QQR      | B         | 0.0065670                       | 0.068828196              |
| PFLCRI     | BIP202_1/OSIP202_2 | 1U1U      | A         | 0.0065720                       | 0.068874194              |
| SWSKTL     | BIP228_1/OSIP228_1 | 2G0Q      | A         | 0.0065720                       | 0.068874194              |
| MMWQNMICYF | BIP227_1/OSIP227_1 | 4O7G      | B         | 0.0066560                       | 0.069168259              |
| FITRKQSIED | BIP231_1/OSIP231_1 | 4TNM      | A         | 0.0067230                       | 0.069445878              |
| IRPIRISVLY | BIP210_2/OSIP210_2 | 4TNM      | A         | 0.0067340                       | 0.069484908              |
| IFQSYRLN   | BIP223_3/OSIP223_3 | 3H7R      | A         | 0.0067650                       | 0.069622516              |
| FSLTDFRAWL | BIP237_2/OSIP237_2 | 1WH2      | A         | 0.0068940                       | 0.070151807              |
| LFWLYCPRLM | BIP233_2/OSIP233_2 | 4Z63      | A         | 0.0069630                       | 0.070419884              |
| WHHKLERTSR | BIP122_1           | 4NC4      | C         | 0.0070100                       | 0.070601972              |
| AAVERGTTPL | BIP97_1            | 5E1J      | A         | 0.0073580                       | 0.071991072              |
| QKCNMYAKLS | BIP240_9/OSIP240_9 | 1U1U      | A         | 0.0073830                       | 0.072087261              |
| CVKHRTTSIP | BIP89_4            | 5GZZ      | D         | 0.0074330                       | 0.072284489              |
| SIELRRFRK  | BIP89_6            | 5I32      | A         | 0.0074360                       | 0.072306175              |
| VKCKLWKEVR | BIP155_6           | 4XK8      | 4         | 0.0075330                       | 0.072680874              |
| EYTDSIFPVL | BIP245_4/OSIP245_4 | 5D79      | A         | 0.0075830                       | 0.072871421              |
| HKSASNNFFL | BIP105_5           | 4Z63      | A         | 0.0077240                       | 0.073404462              |

| Ligand     | SIP                | PDB_match | PDB Chain | Raw <i>p</i> -values (PepSite2) | BH correction (FDR=0.25) |
|------------|--------------------|-----------|-----------|---------------------------------|--------------------------|
| RSTDGVGRRG | BIP231_3/OSIP231_3 | 3NME      | A         | 0.0077370                       | 0.073453393              |
| IHLYSGRDCW | OSIP68_6           | 3R0Q      | G         | 0.0077500                       | 0.073502431              |
| SMFFFLY    | BIP105_2           | 3E16      | B         | 0.0079540                       | 0.074310897              |
| QYILSTHQHI | BIP230_5/OSIP230_5 | 2Q42      | A         | 0.0080670                       | 0.074711944              |
| NHHRNRCQDR | BIP24_1            | 1RP0      | A         | 0.0080940                       | 0.07481054               |
| VLVNANLDVE | BIP228_1/OSIP228_1 | 2G0Q      | A         | 0.0081210                       | 0.074908671              |
| RSSEPSQCLV | BIP26_4/OSIP30_4   | 1YHY      | A         | 0.0082030                       | 0.075214494              |
| TLLNKNNAK  | BIP216_1/OSIP216_1 | 1U3C      | A         | 0.0083140                       | 0.075642814              |
| TFYLHLVFQ  | BIP226_1/OSIP226_1 | 4Z63      | A         | 0.0083440                       | 0.075762288              |
| SCTQVIVIEI | BIP209_2/OSIP209_2 | 3R0Q      | C         | 0.0083830                       | 0.075893327              |
| ISVDVRFHLS | BIP209_2/OSIP209_2 | 3R0Q      | G         | 0.0086100                       | 0.076737689              |
| REWMVTPFK  | BIP239_5/OSIP239_5 | 2CDQ      | B         | 0.0087120                       | 0.077115047              |
| CMRRETINKR | BIP38_4/OSIP43_4   | 1XQ1      | A         | 0.0087120                       | 0.077115047              |
| VLQVRNLPFL | BIP6_2/OSIP8_2     | 4LSA      | A         | 0.0087550                       | 0.077266844              |
| VSCSAYKLYQ | OSIP71_2           | 3DM0      | A         | 0.0087550                       | 0.077266844              |
| PEFSMDPSRL | OSIP114_5          | 3AX1      | A         | 0.0088580                       | 0.077649003              |
| SRGLFIGRSC | BIP214_1/OSIP214_1 | 5K3S      | A         | 0.0089180                       | 0.077878839              |
| AELVQGARLR | BIP180_1/OSIP167_1 | 5HAD      | A         | 0.0089330                       | 0.077933395              |
| AELVQGARLR | BIP180_1/OSIP167_1 | 4MN8      | A         | 0.0089330                       | 0.077933395              |
| RFALQNKLQR | BIP38_2/OSIP43_2   | 4MNA      | A         | 0.0089480                       | 0.07798838               |
| ITQQQHIHTR | BIP231_4/OSIP231_4 | 4IH4      | D         | 0.0089630                       | 0.078050495              |
| QTAPNHLKTT | BIP240_9/OSIP240_9 | 1U1J      | A         | 0.0090380                       | 0.078322818              |
| TIHITRNKTL | BIP222_1/OSIP222_1 | 5KOP      | B         | 0.0091290                       | 0.0786594                |
| LIMFTSSFLY | BIP10_6            | 5KOP      | B         | 0.0092510                       | 0.079105049              |
| ESHQGSSNEI | BIP208_5/OSIP208_5 | 2Q3O      | B         | 0.0093760                       | 0.079560383              |
| KIAFCLSGV  | BIP218_2/OSIP218_2 | 4NFU      | B         | 0.0094540                       | 0.079842866              |
| SLISVGLTKN | BIP224_3/OSIP224_3 | 2G5W      | B         | 0.0095180                       | 0.080067059              |
| PEIRFQVLS  | BIP231_4/OSIP231_4 | 4IH4      | C         | 0.0097100                       | 0.080740097              |
| FNRLSFNGPK | BIP105_5           | 4Z63      | A         | 0.0098730                       | 0.081339058              |
| VLETEARPF  | BIP214_1/OSIP214_1 | 5K2O      | A         | 0.0100100                       | 0.081859139              |
| PQVVDIFPPG | BIP31_1            | 2YIJ      | A         | 0.0100200                       | 0.081864474              |
| VCLNRQTKLV | BIP212_2/OSIP212_2 | 5D79      | A         | 0.0100700                       | 0.082032887              |
| LTYGFPQVVL | BIP239_3/OSIP239_3 | 1U3D      | A         | 0.0100900                       | 0.082118636              |
| RVEINEHLQS | BIP86_1            | 3PYB      | A         | 0.0102300                       | 0.082639422              |
| DRRCFPCHPS | BIP24_1            | 5FDN      | A         | 0.0102600                       | 0.082723952              |
| EIVTLFLI   | BIP231_2/OSIP231_2 | 3OGM      | P         | 0.0104300                       | 0.083333121              |
| DSIPLGFRFL | BIP243_4/OSIP243_4 | 4J0M      | A         | 0.0106600                       | 0.084167306              |
| PKTQFNIFPP | BIP0_3             | 4LSX      | A         | 0.0107300                       | 0.084410208              |
| LVARLRLRAQ | BIP109_6/OSIP106_6 | 5FT9      | B         | 0.0112800                       | 0.086337975              |
| FQFARKQLQI | BIP240_7/OSIP240_7 | 5HZG      | F         | 0.0113000                       | 0.086408625              |
| LEKVVENTVA | BIP3_1             | 4BQE      | A         | 0.0114100                       | 0.086777945              |
| SSRQFQSPNH | BIP6_2/OSIP8_2     | 4LSX      | B         | 0.0114500                       | 0.086918879              |
| IAFLDLTILF | BIP239_3/OSIP239_3 | 1U3D      | A         | 0.0114700                       | 0.086990416              |
| SLYSHVYCVI | BIP149_5/OSIP141_5 | 4LIX      | A         | 0.0115100                       | 0.087128803              |
| KNGYLVSQVN | BIP86_6            | 4LIX      | A         | 0.0116100                       | 0.087468853              |
| SCGHKSHIFC | BIP230_5/OSIP230_5 | 1XM8      | A         | 0.0117200                       | 0.087816072              |

| Ligand      | SIP                | PDB_match | PDB Chain | Raw <i>p</i> -values (PepSite2) | BH correction (FDR=0.25) |
|-------------|--------------------|-----------|-----------|---------------------------------|--------------------------|
| SNRLTMTGSK  | BIP154_1/OSIP145_1 | 4NC4      | C         | 0.0117600                       | 0.087958                 |
| IPYWSFVTSG  | BIP51_6            | 2I9Y      | A         | 0.0117600                       | 0.087958                 |
| RVQYYKVYKA  | OSIP77_2           | 1WE9      | A         | 0.0118000                       | 0.088099679              |
| NPTQIFDIFG  | BIP105_2           | 3EI8      | B         | 0.0119000                       | 0.088447917              |
| LLSSCRSKAV  | OSIP51_4           | 2FGE      | A         | 0.0120000                       | 0.088794146              |
| NMSTLVQIQL  | BIP91_2/OSIP88_2   | 4J0M      | A         | 0.0121400                       | 0.089260996              |
| MTICLRSLPS  | BIP245_4/OSIP245_4 | 5D79      | B         | 0.0121600                       | 0.089333243              |
| SKRVLQSLKS  | OSIP99_6           | 4NFU      | B         | 0.0121800                       | 0.089403622              |
| ITCSITHYRR  | BIP237_2/OSIP237_2 | 1WH2      | A         | 0.0125700                       | 0.090697647              |
| RRLTGSYTRD  | BIP34_4/OSIP39_4   | 1XM8      | B         | 0.0127200                       | 0.09122477               |
| FWSERAWVQI  | BIP180_1/OSIP167_1 | 5HAD      | A         | 0.0128500                       | 0.091677604              |
| RKPLLQFTGE  | BIP206_1/OSIP206_1 | 5FDN      | A         | 0.0130000                       | 0.092179449              |
| DIPYIFLGAR  | BIP214_1/OSIP214_1 | 1YIO      | A         | 0.0131300                       | 0.092612555              |
| CTDILFWDAD  | OSIP143_1          | 2ZFD      | A         | 0.0133000                       | 0.093166134              |
| RFLNFQRINV  | BIP239_2/OSIP239_2 | 1MVL      | A         | 0.0133500                       | 0.093347903              |
| VKGEVTETKE  | BIP155_6           | 4XK8      | 9         | 0.0135000                       | 0.09382991               |
| VQRIFNPFPR  | BIP44_5/OSIP49_5   | 4XAE      | A         | 0.0135500                       | 0.094011457              |
| NRQTKLVFAV  | BIP212_2/OSIP212_2 | 2EVN      | A         | 0.0135900                       | 0.094124585              |
| THSDIEMTSL  | BIP232_2/OSIP232_2 | 5KSD      | B         | 0.0136400                       | 0.09429913               |
| WTHSQEPGTP  | OSIP36_4           | 4OUR      | B         | 0.0137300                       | 0.094600892              |
| TFEFFSSSLI  | BIP227_1/OSIP227_1 | 4O6Y      | A         | 0.0138200                       | 0.094887131              |
| VLACLGYSHY  | BIP149_5/OSIP141_5 | 4LIX      | A         | 0.0138700                       | 0.095056799              |
| IYCRSWRAIV  | OSIP86_3           | 5DQR      | A         | 0.0138700                       | 0.095056799              |
| RDSQLINCPF  | BIP239_2/OSIP239_2 | 1MVL      | A         | 0.0138900                       | 0.095116156              |
| WAKISTVLEI  | BIP231_2/OSIP231_2 | 2P1N      | B         | 0.0140300                       | 0.095584402              |
| LGSCLVLLIL  | BIP3_1             | 4BQE      | A         | 0.0140800                       | 0.095755287              |
| GPVPPSQPSP  | BIP38_2/OSIP43_2   | 4MNA      | A         | 0.0141000                       | 0.09580823               |
| GFMSYYVLL   | BIP10_6            | 5KOP      | B         | 0.0142600                       | 0.096312321              |
| RMCQPDTTSY  | BIP206_1/OSIP206_1 | 5FDN      | A         | 0.0143400                       | 0.09658743               |
| QIPSLSEEMP  | BIP164_2           | 4Z63      | A         | 0.0143800                       | 0.096690656              |
| SQYSGLHSRS  | BIP62_3/OSIP58_3   | 4RL5      | B         | 0.0145800                       | 0.097357486              |
| GPIISCLHNNH | BIP91_2/OSIP88_2   | 4J0M      | A         | 0.0146200                       | 0.097463191              |
| SLEIAVK SVM | BIP175_4           | 1U3C      | A         | 0.0147500                       | 0.097887324              |
| AAYWYEWRRK  | BIP200_2/OSIP200_2 | 3HTX      | A         | 0.0147700                       | 0.097936545              |
| KISSQGTFSH  | BIP236_3/OSIP236_3 | 4N7Q      | A         | 0.0148700                       | 0.098253494              |
| GFRSENTCRL  | BIP218_2/OSIP218_2 | 4NFU      | B         | 0.0149400                       | 0.098469404              |
| LILSHLQALP  | BIP90_3            | 1T1H      | A         | 0.0157600                       | 0.101087414              |
| SASNNFFLLI  | BIP105_5           | 2Q4W      | A         | 0.0161000                       | 0.102139351              |
| LLNLVRNSCF  | BIP218_2/OSIP218_2 | 4NFU      | B         | 0.0161000                       | 0.102139351              |
| LPQSSIVDPS  | BIP223_3/OSIP223_3 | 3H7R      | A         | 0.0167300                       | 0.104092779              |
| LVQNTKGKLT  | BIP174_1           | 2P1N      | D         | 0.0170100                       | 0.104949204              |
| QSILVRIHLV  | BIP233_2/OSIP233_2 | 4Z63      | A         | 0.0170100                       | 0.104949204              |
| IFLMFNFCVY  | OSIP99_3           | 4Z61      | B         | 0.0170600                       | 0.105087571              |
| WALIGLFKDL  | BIP105_5           | 4Z63      | A         | 0.0173500                       | 0.106009891              |
| FFNGYSLLWL  | BIP34_4/OSIP39_4   | 2Q42      | A         | 0.0175200                       | 0.106513215              |
| TRLQSGVRVF  | BIP208_2/OSIP208_2 | 4GL4      | A         | 0.0179900                       | 0.107922622              |

| Ligand      | SIP                | PDB_match | PDB Chain | Raw <i>p</i> -values (PepSite2) | BH correction (FDR=0.25) |
|-------------|--------------------|-----------|-----------|---------------------------------|--------------------------|
| CYSFFNC     | BIP206_2/OSIP206_2 | 1U1U      | A         | 0.0181700                       | 0.108459676              |
| LFTEVRITKH  | BIP235_1/OSIP235_1 | 3H7R      | A         | 0.0181700                       | 0.108459676              |
| KQNSNKKEVK  | BIP243_3/OSIP243_3 | 5HYX      | B         | 0.0182300                       | 0.10864121               |
| KLEWDNVWKS  | BIP86_1            | 4LIX      | A         | 0.0182900                       | 0.108813346              |
| QNLFCNLSDA  | BIP63_1            | 4Z61      | B         | 0.0183200                       | 0.108898748              |
| LKIRMEKND   | BIP242_7/OSIP242_7 | 3OGK      | F         | 0.0184700                       | 0.109349234              |
| DEYDCWWSS   | OSIP94_4           | 2HJ3      | A         | 0.0185200                       | 0.109519237              |
| VKSPVPSRTK  | BIP44_5/OSIP49_5   | 4XAE      | A         | 0.0187800                       | 0.110280281              |
| KSWAKISTVL  | BIP231_2/OSIP231_2 | 3OGM      | H         | 0.0189700                       | 0.110849915              |
| STEVGLVLGR  | BIP239_3/OSIP239_3 | 1U3D      | A         | 0.0190000                       | 0.110940584              |
| ETYGTLCI    | BIP90_4            | 3DM0      | A         | 0.0190300                       | 0.111025685              |
| RQGVPTERR   | BIP67_2/OSIP64_2   | 3HBX      | C         | 0.0191600                       | 0.111408625              |
| HSRSHNTAP   | BIP62_3/OSIP58_3   | 4Z61      | B         | 0.0192500                       | 0.111664391              |
| QSFACLASDM  | BIP142_3/OSIP134_3 | 4LSX      | B         | 0.0195100                       | 0.112443313              |
| LDLSRCKLR   | BIP90_4            | 3DM0      | A         | 0.0201300                       | 0.114259638              |
| VALFHVHAVN  | BIP171_2/OSIP158_2 | 1YDW      | A         | 0.0201600                       | 0.114336491              |
| ANIFFLVVTN  | BIP234_1/OSIP234_1 | 5FT9      | B         | 0.0203000                       | 0.11476147               |
| CHNKLNPLSH  | BIP38_2/OSIP43_2   | 4MNA      | A         | 0.0203600                       | 0.114932168              |
| CCFGLIGKKR  | BIP240_5/OSIP240_5 | 2NTY      | B         | 0.0206700                       | 0.115850134              |
| RRRGLGSKGD  | BIP171_4/OSIP158_4 | 5E1J      | A         | 0.0207400                       | 0.116056591              |
| FHLLAGLVWL  | OSIP99_1           | 2Q4E      | A         | 0.0213300                       | 0.117772765              |
| CAEPQRGRC   | BIP51_6            | 2I9Y      | A         | 0.0213400                       | 0.117825734              |
| SAEVPPWIPC  | BIP90_3            | 1T1H      | A         | 0.0213600                       | 0.117844351              |
| PISTIDSVNE  | BIP22_1/OSIP25_1   | 3OGK      | N         | 0.0214300                       | 0.11804765               |
| FLHNHKSYS   | BIP242_2/OSIP242_2 | 1N7G      | C         | 0.0221500                       | 0.120075806              |
| RQFKALYQYI  | BIP4_2/OSIP5_2     | 5HH7      | A         | 0.0226700                       | 0.121560274              |
| LKYIKMEHNN  | BIP243_3/OSIP243_3 | 5HYX      | B         | 0.0228900                       | 0.122170217              |
| LDSSTSHV GK | OSIP99_6           | 4NFU      | B         | 0.0229700                       | 0.122399955              |
| VQLTTES     | BIP62_3/OSIP58_3   | 4RL5      | B         | 0.0230800                       | 0.122691886              |
| RVCLLVLARF  | BIP240_7/OSIP240_7 | 5HZG      | B         | 0.0231200                       | 0.122801725              |
| RSMLQRVRLV  | BIP88_4/OSIP84_4   | 5HTR      | A         | 0.0232300                       | 0.123108674              |
| EKFSPED     | BIP212_3/OSIP212_3 | 5FDN      | A         | 0.0236900                       | 0.124444471              |
| KRTIKNTYIG  | BIP240_4/OSIP240_4 | 4CXV      | A         | 0.0238500                       | 0.124846516              |
| NNRESERGEN  | BIP240_5/OSIP240_5 | 2NTY      | B         | 0.0239700                       | 0.125180233              |
| ILERRIYPSV  | BIP233_2/OSIP233_2 | 4Z63      | A         | 0.0240500                       | 0.125412996              |
| AFNRSRRALR  | BIP224_2/OSIP224_2 | 2VY2      | A         | 0.0242100                       | 0.125866341              |
| SQVYSSHTYV  | BIP38_2/OSIP43_2   | 4MN8      | A         | 0.0242900                       | 0.126083567              |
| RGRYTFLLHTY | OSIP94_4           | 2HJ3      | A         | 0.0244500                       | 0.126522559              |
| EQRLGFHLLA  | OSIP99_1           | 5GQ0      | B         | 0.0246100                       | 0.126958916              |
| LQIAVCFANL  | BIP212_3/OSIP212_3 | 5FDN      | A         | 0.0246900                       | 0.127175734              |
| DLNQPKMYKF  | BIP229_2/OSIP229_2 | 2XCM      | F         | 0.0248100                       | 0.127498098              |
| LVTGFTS     | OSIP114_5          | 3AX1      | A         | 0.0248200                       | 0.127543025              |
| ALNNYRLQIP  | OSIP103_6          | 2C59      | A         | 0.0253500                       | 0.128950803              |
| VLLVVTYHRE  | BIP236_3/OSIP236_3 | 4N7Q      | A         | 0.0254300                       | 0.129157373              |
| VQEKVITSSL  | OSIP50_2           | 5A5K      | S         | 0.0254300                       | 0.129157373              |
| RIWSLQLKYT  | BIP235_1/OSIP235_1 | 3H7R      | A         | 0.0255100                       | 0.129363564              |



| Ligand     | SIP                | PDB_match | PDB Chain | Raw <i>p</i> -values (PepSite2) | BH correction (FDR=0.25) |
|------------|--------------------|-----------|-----------|---------------------------------|--------------------------|
| FAQSYSFFLQ | BIP50_3            | 2J3H      | A         | 0.0256400                       | 0.129731668              |
| KKELIIFFSG | OSIP99_6           | 4NFU      | B         | 0.0257200                       | 0.129936132              |
| RQNHHRNRCQ | BIP24_1            | 5FDN      | A         | 0.0258500                       | 0.130300278              |
| MMNSIDNKNQ | BIP243_4/OSIP243_4 | 4J0M      | A         | 0.0258500                       | 0.130300278              |
| KTGDAYLSSG | BIP34_4/OSIP39_4   | 1XM8      | B         | 0.0261500                       | 0.131109139              |
| GTNFVTRTLV | BIP208_6/OSIP208_6 | 1N7G      | C         | 0.0262300                       | 0.131318332              |
| KKLQDDAMMA | BIP226_2/OSIP226_2 | 4FRZ      | A         | 0.0262300                       | 0.131318332              |
| FGGVESWIHI | BIP38_4/OSIP43_4   | 1XQ1      | A         | 0.0263200                       | 0.131568994              |
| IVIDRVQICN | BIP218_3/OSIP218_3 | 5TEB      | H         | 0.0265400                       | 0.132158608              |
| SIHHRFESSF | BIP240_4/OSIP240_4 | 4CWM      | B         | 0.0266700                       | 0.132496868              |
| NNGDVREDLS | BIP86_1            | 3PYA      | A         | 0.0269800                       | 0.133347274              |
| VFSYFMDNKR | BIP224_2/OSIP224_2 | 2VY2      | A         | 0.0270200                       | 0.133442025              |
| IPMLYMLVSY | BIP109_2/OSIP106_2 | 1U1H      | A         | 0.0272900                       | 0.134157036              |
| SSVFNVLLQV | BIP89_2            | 4EQ4      | B         | 0.0277400                       | 0.135346468              |
| RRYRFPNSCL | BIP226_4/OSIP226_4 | 5HTR      | A         | 0.0282900                       | 0.136803225              |
| PTRVFGNRVS | BIP233_1/OSIP233_1 | 3RIZ      | A         | 0.0282900                       | 0.136803225              |
| DFDCRNCGV  | BIP97_3            | 3PPZ      | A         | 0.0284700                       | 0.137259041              |
| LDIRFMPERY | OSIP52_5           | 2WTB      | A         | 0.0284700                       | 0.137259041              |
| QSFSVQLTTE | BIP62_3/OSIP58_3   | 4Z61      | A         | 0.0288000                       | 0.138130201              |
| SCDNSQYSGL | BIP62_3/OSIP58_3   | 4Z61      | A         | 0.0290400                       | 0.138766252              |
| DCAENEYDRN | OSIP70_3           | 2Q45      | A         | 0.0290400                       | 0.138766252              |
| FVSNCFIWKG | BIP217_2/OSIP217_2 | 4Z61      | B         | 0.0291800                       | 0.139124059              |
| MMQVISEVVS | BIP206_1/OSIP206_1 | 5FDN      | A         | 0.0293700                       | 0.139612889              |
| KEVHDGRVMV | BIP101_6/OSIP98_6  | 4XK8      | 7         | 0.0298100                       | 0.14076609               |
| HVHKFCEACS | BIP218_3/OSIP218_3 | 5TEB      | F         | 0.0299100                       | 0.141022794              |
| MYIHEIEMKK | BIP34_4/OSIP39_4   | 2Q42      | B         | 0.0299100                       | 0.141022794              |
| IFLFFWFHAL | BIP244_1/OSIP244_1 | 4N0G      | D         | 0.0299500                       | 0.141114425              |
| IHTHMDLIIS | BIP202_1/OSIP202_2 | 1U1U      | A         | 0.0301500                       | 0.141621516              |
| DPDNPTQIFD | BIP105_2           | 2APJ      | B         | 0.0302000                       | 0.141754676              |
| LKHLPIPRHK | OSIP103_6          | 2C5E      | B         | 0.0302000                       | 0.141754676              |
| DILFWDADFP | OSIP143_1          | 2P1N      | D         | 0.0304000                       | 0.142277991              |
| VIENQVRFDC | BIP174_1           | 2P1N      | D         | 0.0305000                       | 0.142532498              |
| TGNSSTLVSS | OSIP36_5           | 2WSF      | A         | 0.0306000                       | 0.142784996              |
| NLCQAYIVLH | BIP124_5/OSIP115_5 | 5FDN      | A         | 0.0310000                       | 0.143811587              |
| GQLCPSLNWG | BIP31_1            | 5FDN      | A         | 0.0310000                       | 0.143811587              |
| QLSTYQKPNR | BIP142_4/OSIP134_4 | 4N0G      | A         | 0.0313500                       | 0.144748439              |
| QNPYQIKKNL | BIP218_1/OSIP218_1 | 2EFC      | C         | 0.0315100                       | 0.145140998              |
| SKESISISVS | BIP89_6            | 5I32      | A         | 0.0317100                       | 0.145640736              |
| LFQVVTALVC | BIP212_3/OSIP212_3 | 5FDN      | A         | 0.0319200                       | 0.146170456              |
| QVAYWRLHSK | BIP43_1            | 2DGE      | D         | 0.0319700                       | 0.146283498              |
| HTTWSSMSS  | BIP240_9/OSIP240_9 | 1U1U      | A         | 0.0321800                       | 0.146809666              |
| SLLPFLTDF  | BIP237_2/OSIP237_2 | 5IGO      | A         | 0.0322900                       | 0.147101005              |
| YRFYFLII   | OSIP114_6          | 1GCC      | A         | 0.0331500                       | 0.149282028              |
| GLVWLVNPSR | OSIP99_1           | 5GQ0      | B         | 0.0332000                       | 0.149393423              |
| DMSIICMFSV | BIP240_4/OSIP240_4 | 4CXV      | A         | 0.0332500                       | 0.149525729              |
| RVSRRRKSSI | OSIP51_4           | 2FGE      | B         | 0.0334100                       | 0.149925544              |

| Ligand     | SIP                | PDB_match | PDB Chain | Raw p-values (PepSite2) | BH correction (FDR=0.25) |
|------------|--------------------|-----------|-----------|-------------------------|--------------------------|
| NQILEQHDPI | BIP214_1/OSIP214_1 | 4XK8      | H         | 0.0335800               | 0.150348193              |
| SVITYPSCTQ | BIP209_2/OSIP209_2 | 2ZFD      | A         | 0.0338500               | 0.151003875              |
| RLQHHAESLP | BIP208_6/OSIP208_6 | 1N7G      | B         | 0.0340700               | 0.151535625              |
| TLVATPRCVS | BIP97_6            | 4QQR      | B         | 0.0346900               | 0.153090811              |
| AVMEKQSKVC | BIP109_2/OSIP106_2 | 1U22      | A         | 0.0350300               | 0.153920874              |
| LNHHCRFSGK | BIP243_2/OSIP243_2 | 5E4W      | D         | 0.0352500               | 0.154436627              |
| VATRQSPRVP | BIP122_2           | 3VEM      | C         | 0.0353100               | 0.154590507              |
| LGNQRKKAYH | BIP212_3/OSIP212_3 | 5FDN      | A         | 0.0353700               | 0.154744637              |
| SGKINLQKAQ | BIP66_2            | 5DQQ      | A         | 0.0353700               | 0.154744637              |
| NLPAIFVSQK | OSIP71_2           | 3DM0      | A         | 0.0354800               | 0.155000615              |
| RHFLEQSRLP | BIP89_5            | 5JO2      | B         | 0.0361800               | 0.156730397              |
| CKYAMQCNAK | BIP209_1/OSIP209_1 | 4LDY      | A         | 0.0367100               | 0.158007259              |
| HMIMASCDFV | BIP97_3            | 3PPZ      | A         | 0.0367100               | 0.158007259              |
| EHENEITVCL | BIP212_2/OSIP212_2 | 2Q4Y      | A         | 0.0367700               | 0.158154087              |
| LCHVYSAVRC | BIP233_1/OSIP233_1 | 4M7E      | B         | 0.0372500               | 0.159294505              |
| VEGSTISYCC | OSIP51_4           | 2FGE      | A         | 0.0373700               | 0.159574315              |
| SQRIMPLVIA | BIP208_2/OSIP208_2 | 1JXC      | A         | 0.0375600               | 0.160035916              |
| LMGTDCKFVG | BIP91_2/OSIP88_2   | 4J0M      | A         | 0.0382300               | 0.161646753              |
| RFFQSMIAAS | BIP218_4/OSIP218_4 | 4QNK      | A         | 0.0382900               | 0.161784431              |
| RRQIADIMI  | BIP67_2/OSIP64_2   | 3HBX      | F         | 0.0384800               | 0.162235883              |
| STDYGFNFFF | BIP66_1            | 4EQ4      | A         | 0.0385400               | 0.162367483              |
| EMDSVLGGSE | OSIP70_3           | 2Q45      | A         | 0.0389200               | 0.163275279              |
| EPTIVPDCLS | BIP235_4/OSIP235_4 | 2Q4W      | A         | 0.0390400               | 0.16356266               |
| SRWSLEIAVK | BIP175_4           | 2CF6      | A         | 0.0392300               | 0.164012724              |
| MFLGDRIMFF | BIP10_6            | 2Z20      | A         | 0.0394200               | 0.164455755              |
| LPQVVDIFPP | BIP31_1            | 5FDN      | A         | 0.0394900               | 0.164618986              |
| MKKEDIGRRF | BIP38_2/OSIP43_2   | 3CQR      | B         | 0.0394900               | 0.164618986              |
| ILKSIRHMRY | BIP243_2/OSIP243_2 | 5E4W      | D         | 0.0395500               | 0.164761219              |
| NDLSKEVAPG | BIP31_1            | 4EQ4      | B         | 0.0395500               | 0.164761219              |
| HSDLQKDSWV | BIP90_3            | 1T1H      | A         | 0.0402000               | 0.166266114              |
| TSITLPMR   | BIP4_2/OSIP5_2     | 5HH7      | A         | 0.0402700               | 0.166425248              |
| EELARLDKFD | OSIP71_2           | 3DM0      | A         | 0.0403900               | 0.166689884              |
| EVERQENGWF | BIP175_4           | 2CF5      | A         | 0.0404600               | 0.166860488              |
| YLSKFLISHF | BIP242_2/OSIP242_2 | 1N7G      | B         | 0.0407800               | 0.167589395              |
| KKNEKEKKFM | BIP240_5/OSIP240_5 | 2WBL      | A         | 0.0410500               | 0.168220181              |
| EQRIKQNK   | BIP224_4/OSIP224_4 | 4RQT      | A         | 0.0410700               | 0.168295543              |
| VLLPNSFFPL | OSIP99_3           | 4Z61      | B         | 0.0411800               | 0.168515404              |
| KITRGHNHMH | BIP97_6            | 4N7R      | C         | 0.0412500               | 0.168685191              |
| QLCPSLNWGT | BIP31_1            | 2YIJ      | A         | 0.0415100               | 0.169276762              |
| SSPPSLLSQA | BIP242_6/OSIP242_6 | 1TG5      | A         | 0.0417800               | 0.169899522              |
| RAWLVMSVSP | BIP237_2/OSIP237_2 | 5IGO      | B         | 0.0419200               | 0.170215209              |
| QAVKKLRID  | BIP71_4/OSIP67_4   | 4RQW      | A         | 0.0421900               | 0.170817745              |
| CEKERKWTMN | BIP209_1/OSIP209_1 | 4LDY      | A         | 0.0422600               | 0.170982385              |
| PKSNRFQFAL | BIP238_2/OSIP238_2 | 1ZWJ      | A         | 0.0426000               | 0.171753791              |
| FTNKQKKFIQ | BIP218_1/OSIP218_1 | 2EFD      | C         | 0.0426700               | 0.17190842               |
| SSPKIPDSPV | BIP209_1/OSIP209_1 | 4EET      | B         | 0.0430100               | 0.172679142              |

| Ligand      | SIP                | PDB_match | PDB Chain | Raw <i>p</i> -values (PepSite2) | BH correction (FDR=0.25) |
|-------------|--------------------|-----------|-----------|---------------------------------|--------------------------|
| WRNLKEMRQR  | BIP142_2/OSIP134_2 | 5CTO      | C         | 0.0435700                       | 0.173960074              |
| IWFRINNELE  | BIP243_4/OSIP243_4 | 4J0M      | B         | 0.0444200                       | 0.175876905              |
| PVLQRKPKLV  | BIP37_5            | 3UDB      | E         | 0.0447100                       | 0.176507265              |
| VSTRYNILCY  | BIP206_2/OSIP206_2 | 1W07      | A         | 0.0447800                       | 0.176655911              |
| VRSRREGKSK  | BIP3_1             | 4BQE      | A         | 0.0450700                       | 0.177310043              |
| VGILIDLCH   | BIP73_2/OSIP75_2   | 4MN8      | B         | 0.0453500                       | 0.177952663              |
| SNLLYLATVT  | BIP239_2/OSIP239_2 | 1MVL      | A         | 0.0453600                       | 0.177952663              |
| VSFITVSYHF  | BIP240_4/OSIP240_4 | 4CWM      | B         | 0.0455800                       | 0.178423641              |
| KSVRAGSNYI  | BIP242_2/OSIP242_2 | 1N7G      | B         | 0.0458700                       | 0.179047364              |
| SPVPSRTKFR  | BIP44_5/OSIP49_5   | 4QEO      | A         | 0.0463900                       | 0.180176282              |
| TRCITCHLRS  | BIP106_6           | 4Q75      | B         | 0.0464600                       | 0.180324403              |
| QHLDDKLFVR  | BIP226_2/OSIP226_2 | 4FRZ      | A         | 0.0464600                       | 0.180324403              |
| GTARRRSLEL  | BIP224_2/OSIP224_2 | 2VY2      | A         | 0.0465400                       | 0.180504204              |
| KIGHHCRRRG  | BIP219_3/OSIP219_3 | 4IC6      | B         | 0.0466100                       | 0.18065348               |
| PRYTSHSQIF  | BIP223_3/OSIP223_3 | 4QQR      | B         | 0.0471400                       | 0.181800966              |
| TQKKGEVNLV  | BIP243_3/OSIP243_3 | 5HYX      | B         | 0.0474400                       | 0.182452564              |
| QEQQGDLHR   | BIP216_2/OSIP216_2 | 2CDQ      | B         | 0.0479000                       | 0.183444151              |
| RLSFNGPKWA  | BIP105_5           | 2Q4W      | A         | 0.0481300                       | 0.183930817              |
| MTLCFNAVNT  | BIP5_1/OSIP6_1     | 2EFD      | A         | 0.0487500                       | 0.185272361              |
| LSIHSTKNRR  | BIP6_2/OSIP8_2     | 4LSA      | A         | 0.0487500                       | 0.185272361              |
| CYHGVSYTHS  | BIP129_6           | 5D79      | B         | 0.0489100                       | 0.18561521               |
| NPKSNRFQFA  | BIP238_2/OSIP238_2 | 4NFU      | A         | 0.0490600                       | 0.185925994              |
| TYMYPRFDSS  | BIP38_1/OSIP43_1   | 5HYW      | A         | 0.0491400                       | 0.1860935                |
| IIIDRNPQS   | BIP225_2/OSIP225_2 | 4NT1      | D         | 0.0492200                       | 0.186264308              |
| IILEHLVLLM  | BIP233_2/OSIP233_2 | 4Z63      | A         | 0.0493000                       | 0.18643251               |
| FVILTSVNNV  | BIP235_2/OSIP235_2 | 4EQ4      | B         | 0.0493000                       | 0.18643251               |
| KHSKCKYAMQ  | BIP209_1/OSIP209_1 | 4EET      | B         | 0.0493800                       | 0.186600817              |
| VMGPFSGPSE  | OSIP168_1          | 4EQ4      | A         | 0.0496900                       | 0.187261714              |
| VFRMSENPSSE | BIP216_2/OSIP216_2 | 2CDQ      | B         | 0.0499300                       | 0.18778169               |
| IFGSMFFFL   | BIP105_2           | 1PXY      | B         | 0.0504100                       | 0.188806995              |
| KTFNISGQE   | BIP0_3             | 3RIZ      | A         | 0.0507400                       | 0.189512531              |
| SPLFVKMLTR  | OSIP24_6           | 4NFU      | A         | 0.0507400                       | 0.189512531              |
| KLWILPLIIS  | BIP89_2            | 4FYP      | B         | 0.0509800                       | 0.190011935              |
| EDVSTRYNIL  | BIP206_2/OSIP206_2 | 1U1J      | A         | 0.0514700                       | 0.1910408                |
| SHRRRIRRLC  | BIP31_1            | 5FDN      | B         | 0.0517200                       | 0.191553202              |
| ICEHQTIHS   | BIP4_2/OSIP5_2     | 5HH7      | A         | 0.0518800                       | 0.191872228              |
| LFIVLMRLV   | BIP216_2/OSIP216_2 | 2CDQ      | B         | 0.0522200                       | 0.192586714              |
| FLARNVECRF  | BIP0_6             | 4XK8      | G         | 0.0535600                       | 0.195366277              |
| QPSALIPCWI  | BIP230_2/OSIP230_2 | 1IBJ      | A         | 0.0536500                       | 0.195558319              |
| PNLVVFNISR  | OSIP114_6          | 1GCC      | A         | 0.0536500                       | 0.195558319              |
| DPEKRDPDNP  | BIP105_2           | 5FT9      | B         | 0.0541600                       | 0.196616989              |
| FDIKKIFRWI  | BIP204_2/OSIP204_2 | 5HTR      | A         | 0.0546000                       | 0.197528662              |
| IIPMLKHIIE  | BIP88_3/OSIP84_3   | 2VY2      | A         | 0.0549400                       | 0.19822637               |
| QGAFGRWSRV  | BIP155_5           | 5L25      | A         | 0.0554700                       | 0.199300184              |
| FSLNCFGYV   | BIP73_2/OSIP75_2   | 4MN8      | B         | 0.0561800                       | 0.200728631              |
| RKRRNNFSCS  | BIP142_4/OSIP134_4 | 4N0G      | B         | 0.0567200                       | 0.201827368              |

| Ligand     | SIP                | PDB_match | PDB Chain | Raw <i>p</i> -values (PepSite2) | BH correction (FDR=0.25) |
|------------|--------------------|-----------|-----------|---------------------------------|--------------------------|
| LTQETLRPYF | BIP218_1/OSIP218_1 | 2EFD      | A         | 0.0567200                       | 0.201827368              |
| SHSQIFQSYR | BIP223_3/OSIP223_3 | 3UC3      | A         | 0.0570800                       | 0.202558839              |
| GSGSFLPICS | BIP240_9/OSIP240_9 | 1U1U      | A         | 0.0571700                       | 0.202747044              |
| YYQPKEIRPL | OSIP52_5           | 2WTB      | A         | 0.0573500                       | 0.2030957                |
| REESQQTKWV | BIP210_3/OSIP210_3 | 2VCE      | A         | 0.0574400                       | 0.203277565              |
| TSKKDSVFL  | BIP6_2/OSIP8_2     | 3RIZ      | A         | 0.0577100                       | 0.203811759              |
| QKNGQKENKV | BIP221_3/OSIP221_3 | 3NMV      | B         | 0.0580800                       | 0.204537751              |
| LANQHLQKAN | BIP21_5/OSIP23_5   | 2EFD      | A         | 0.0581700                       | 0.204708051              |
| VNGFSLNLSK | OSIP114_6          | 1GCC      | A         | 0.0584500                       | 0.205260426              |
| VCFHKDINLI | BIP243_2/OSIP243_2 | 5E4W      | C         | 0.0591900                       | 0.206738965              |
| QEEKKTLRE  | BIP71_4/OSIP67_4   | 4RQW      | A         | 0.0592900                       | 0.206938718              |
| NLLPSFFIIF | BIP168_4/OSIP154_4 | 2O01      | H         | 0.0594700                       | 0.207294513              |
| RECLSQRIMP | BIP208_2/OSIP208_2 | 4GQY      | C         | 0.0598500                       | 0.208028198              |
| FQSGRFVCGD | BIP233_1/OSIP233_1 | 4M7E      | A         | 0.0598500                       | 0.208028198              |
| CSQLSTYQKP | BIP142_4/OSIP134_4 | 5A4X      | A         | 0.0605200                       | 0.209360044              |
| WRENVKLCFW | BIP0_6             | 4XK8      | G         | 0.0607100                       | 0.209736658              |
| HSSDPVNIWK | BIP235_4/OSIP235_4 | 2Q4W      | A         | 0.0607100                       | 0.209736658              |
| FMQFGDRQIR | BIP59_1            | 3UI2      | A         | 0.0608000                       | 0.2098965                |
| ALRNTSGRIP | BIP68_1            | 4OH3      | B         | 0.0610000                       | 0.210303386              |
| IFALQKLKSL | BIP243_3/OSIP243_3 | 5HYX      | B         | 0.0611900                       | 0.210671458              |
| LLNIFWFDQY | BIP238_2/OSIP238_2 | 4NFU      | A         | 0.0613800                       | 0.211030445              |
| KSSLRHWSQS | BIP233_1/OSIP233_1 | 4M7E      | B         | 0.0616700                       | 0.211599594              |
| FTKVFIYNTK | BIP69_2/OSIP65_2   | 2EFD      | C         | 0.0627500                       | 0.213696293              |
| SVVWITCSIT | BIP237_2/OSIP237_2 | 5IGO      | A         | 0.0632500                       | 0.21464167               |
| FPLDFHRVMM | BIP208_5/OSIP208_5 | 2Q4L      | B         | 0.0633500                       | 0.21482719               |
| YFIPICVVTP | BIP245_1/OSIP245_1 | 5KOD      | B         | 0.0636500                       | 0.215404009              |
| QIRQRSDKKS | BIP59_1            | 3UI2      | A         | 0.0639500                       | 0.21597445               |
| QIRQRSDKKS | BIP59_1            | 3DEO      | A         | 0.0639500                       | 0.21597445               |
| RKNVEYHFWR | BIP0_6             | 4XK8      | G         | 0.0641500                       | 0.216354499              |
| PFLKRIEIDS | BIP238_3/OSIP238_3 | 1VK0      | A         | 0.0647600                       | 0.217503744              |
| IKEEVFEICI | BIP223_4/OSIP223_4 | 2RU1      | A         | 0.0650600                       | 0.218048303              |
| NQARGAEEIV | BIP37_5            | 3UC3      | A         | 0.0652700                       | 0.218447687              |
| VDPSPSPRYT | BIP223_3/OSIP223_3 | 3UC3      | A         | 0.0659900                       | 0.219818012              |
| KKRNLDIIRA | BIP235_1/OSIP235_1 | 3H7R      | A         | 0.0659900                       | 0.219818012              |
| MLLSHLFASL | BIP50_3            | 2J3I      | B         | 0.0664000                       | 0.220555451              |
| FGGKMLNCFV | BIP0_5             | 4TJX      | A         | 0.0666100                       | 0.220953314              |
| REEEHENEIT | BIP212_2/OSIP212_2 | 5D79      | A         | 0.0673500                       | 0.222331711              |
| PIVQEKVITS | OSIP50_2           | 1YYC      | A         | 0.0676600                       | 0.222887975              |
| LFFDDREKSS | BIP226_2/OSIP226_2 | 4FRZ      | A         | 0.0680900                       | 0.223714138              |
| NFFAFFNPYG | BIP245_2/OSIP245_2 | 4PXB      | A         | 0.0686200                       | 0.224675848              |
| RRYVIQLMKY | BIP244_9/OSIP244_9 | 2GM3      | B         | 0.0687300                       | 0.224884558              |
| CMYGCMHECT | OSIP143_1          | 2P1N      | D         | 0.0699200                       | 0.227053587              |
| KRIRDNILRR | BIP231_6/OSIP231_6 | 2JKI      | B         | 0.0703600                       | 0.227844047              |
| KLKIPNTNLN | BIP238_2/OSIP238_2 | 2Q4L      | B         | 0.0705800                       | 0.228259968              |
| NLDIKIIRRS | OSIP99_3           | 4Z61      | B         | 0.0714600                       | 0.229860994              |
| IARPRIMIGE | BIP88_2/OSIP84_2   | 1OGP      | F         | 0.0715800                       | 0.230078928              |

| Ligand     | SIP                | PDB_match | PDB Chain | Raw <i>p</i> -values (PepSite2) | BH correction (FDR=0.25) |
|------------|--------------------|-----------|-----------|---------------------------------|--------------------------|
| HRCTSKIKVN | BIP24_1            | 5FDN      | A         | 0.0718000                       | 0.230472044              |
| VVFGGKMLNC | BIP0_5             | 4TJV      | A         | 0.0721400                       | 0.231072809              |
| EDRTVMLSFP | BIP216_3/OSIP216_3 | 1TIZ      | A         | 0.0722500                       | 0.231278692              |
| AGKLNPFMLF | BIP6_6/OSIP8_6     | 1ZWJ      | B         | 0.0723600                       | 0.231469126              |
| RTSGIIPMLK | BIP88_3/OSIP84_3   | 4N7R      | C         | 0.0733800                       | 0.233241367              |
| VKYGAGCTRP | BIP240_7/OSIP240_7 | 1U1H      | A         | 0.0737200                       | 0.233837703              |
| PQSSIVDPSP | BIP223_3/OSIP223_3 | 5E4W      | B         | 0.0739500                       | 0.23426728               |
| SPSWRSTLPQ | BIP88_4/OSIP84_4   | 5HTR      | A         | 0.0739500                       | 0.23426728               |
| MKRMAFCAKN | OSIP166_6          | 3UDB      | E         | 0.0751100                       | 0.236276555              |
| ILVLLGRYCT | OSIP50_1           | 4QQR      | B         | 0.0755800                       | 0.237076815              |
| GVQYILSTHQ | BIP230_5/OSIP230_5 | 3UDB      | C         | 0.0764000                       | 0.238478004              |
| ENMQIIDISP | BIP240_6/OSIP240_6 | 5A3V      | A         | 0.0766400                       | 0.238906914              |
| MNWRVDVKSS | BIP71_4/OSIP67_4   | 4RQW      | A         | 0.0770000                       | 0.239538762              |
| VFYGSFSLTC | OSIP114_6          | 1GCC      | A         | 0.0772300                       | 0.239911326              |
| CGILKEVHKN | BIP161_3/OSIP147_3 | 4FRZ      | A         | 0.0774700                       | 0.240315099              |
| LEQSRLPPVE | BIP89_5            | 2VCH      | A         | 0.0774700                       | 0.240315099              |
| NVFFGGKMLN | OSIP10_5           | 2J3I      | B         | 0.0775900                       | 0.240524458              |
| RRNGRSLDWR | BIP224_2/OSIP224_2 | 2VY2      | A         | 0.0782000                       | 0.241573114              |
| TNPQHNYGSG | BIP224_5/OSIP224_5 | 4XK8      | 6         | 0.0785600                       | 0.242174961              |
| FGHKLYNSLC | BIP38_1/OSIP43_1   | 5HZG      | F         | 0.0791700                       | 0.243211136              |
| TPERSDPEKR | BIP105_2           | 2APJ      | B         | 0.0794100                       | 0.243628722              |
| HQNQIKEYFI | BIP244_8/OSIP244_8 | 4HHD      | B         | 0.0796600                       | 0.244062067              |
| TSYFCRDNQG | BIP230_2/OSIP230_2 | 1IBJ      | A         | 0.0816500                       | 0.247415197              |
| RSKSMNHQIY | BIP22_3/OSIP25_3   | 3B5I      | A         | 0.0820300                       | 0.248037959              |
