# Supplementary material for: Large-scale docking predicts that sORF-encoded peptides may function through protein-peptide interactions in Arabidopsis thaliana
Source: PubMed Central journal article supplement (PMC6188750; doi:10.1371/journal.pone.0205179), 2018-10-15
Supplement: pone.0205179.s006.pdf [file pone.0205179.s006.pdf]

| Ligand      | SIP                | PDB_match | PDB Chain | Raw <i>p</i> -values (PepSite2) | BH correction (FDR=0.25) | Average $\Delta G$ (kcal/mol) | Std. Dev. | Std. Err. of Mean |
|-------------|--------------------|-----------|-----------|---------------------------------|--------------------------|-------------------------------|-----------|-------------------|
| AAYWYEWRRK  | BIP200_2/OSIP200_2 | 3HTX      | A         | 0.014770                        | 0.097936545              | -48.35930                     | 4.77940   | 0.4779            |
| ALNNYRLQIP  | OSIP103_6          | 2C59      | A         | 0.025350                        | 0.128950803              | -8.39420                      | 3.12150   | 0.3122            |
| ALRIPKLYLV  | OSIP85_3           | 2WSE      | B         | 0.000253                        | 0.043062533              | -45.26180                     | 5.13750   | 0.5137            |
| APCPSLLHKL  | BIP209_3/OSIP209_3 | 5IYX      | A         | 0.000460                        | 0.043062533              | -0.63730                      | 6.02520   | 0.6025            |
| DEYDCWWSS   | OSIP94_4           | 2HJ3      | A         | 0.018520                        | 0.109519237              | -37.86870                     | 4.12040   | 0.4120            |
| DLNQPKMYKF  | BIP229_2/OSIP229_2 | 2XCM      | F         | 0.024810                        | 0.127498098              | -19.53060                     | 3.84570   | 0.3846            |
| EDVSTRYNIL  | BIP206_2/OSIP206_2 | 1U1J      | A         | 0.051470                        | 0.191040800              | -26.03370                     | 6.33560   | 0.6336            |
| EHENEITVCL  | BIP212_2/OSIP212_2 | 2Q4Y      | A         | 0.036770                        | 0.158154087              | -36.20320                     | 5.51610   | 0.5516            |
| EPTIVPDCLS  | BIP235_4/OSIP235_4 | 2Q4W      | A         | 0.039040                        | 0.163562660              | -13.90500                     | 3.72670   | 0.3727            |
| EQRIKQNK    | BIP224_4/OSIP224_4 | 4RQT      | A         | 0.041070                        | 0.168295543              | -15.58430                     | 3.53910   | 0.3539            |
| FAVEFQVRK   | BIP212_2/OSIP212_2 | 5D79      | B         | 0.004563                        | 0.060419515              | -49.89540                     | 6.65090   | 0.6651            |
| FFDDVKSRRRL | BIP103_3           | 2XQR      | A         | 0.004392                        | 0.059654394              | -29.55310                     | 5.49970   | 0.5500            |
| FGHKLYNSLC  | BIP38_1/OSIP43_1   | 5HZG      | F         | 0.079170                        | 0.243211136              | -34.48440                     | 8.72100   | 0.8721            |
| FLARNVECRF  | BIP0_6             | 4XK8      | G         | 0.053560                        | 0.195366277              | -22.16490                     | 3.10120   | 0.3101            |
| FLMFSYFWCC  | BIP6_6/OSIP8_6     | 1U3D      | A         | 0.004255                        | 0.059077753              | -34.50010                     | 5.27970   | 0.5280            |
| FSLTDFRAWL  | BIP237_2/OSIP237_2 | 1WH2      | A         | 0.006894                        | 0.070151807              | -15.47240                     | 7.09220   | 0.7092            |
| FTKVFIYNTK  | BIP69_2/OSIP65_2   | 2EFD      | C         | 0.062750                        | 0.213696293              | -20.12880                     | 7.08030   | 0.7080            |
| GIYLYNKCAF  | OSIP68_6           | 3R0Q      | G         | 0.003906                        | 0.057508502              | -31.84320                     | 5.80910   | 0.5809            |
| GLVWLVNPSR  | OSIP99_1           | 5GQ0      | B         | 0.033200                        | 0.149393423              | -1.90370                      | 3.68130   | 0.3681            |
| HQNQIKEYFI  | BIP244_8/OSIP244_8 | 4HHD      | B         | 0.079660                        | 0.244062067              | -11.40990                     | 4.36070   | 0.4361            |
| IARPRIMIGE  | BIP88_2/OSIP84_2   | 1OGP      | F         | 0.071580                        | 0.230078928              | -38.33590                     | 5.86950   | 0.5869            |
| IFALQKLKSL  | BIP243_3/OSIP243_3 | 5HYX      | B         | 0.061190                        | 0.210671458              | -0.91440                      | 4.75250   | 0.4752            |
| IFLFFWFHAL  | BIP244_1/OSIP244_1 | 4N0G      | D         | 0.029950                        | 0.141114425              | -39.59630                     | 5.01380   | 0.5014            |
| IIIIDRNPQS  | BIP225_2/OSIP225_2 | 4NT1      | D         | 0.049220                        | 0.186264308              | -10.35640                     | 6.69850   | 0.6698            |
| ILRRICILIT  | BIP231_6/OSIP231_6 | 4A0G      | A         | 0.002503                        | 0.050945665              | -50.44350                     | 7.70320   | 0.7703            |
| IPYWSFVTSG  | BIP51_6            | 2I9Y      | A         | 0.011760                        | 0.087958000              | -17.98000                     | 6.68070   | 0.6681            |
| ISCGHKSHIF  | BIP230_5/OSIP230_5 | 5ECK      | A         | 0.000815                        | 0.043167944              | -5.77180                      | 4.34800   | 0.4348            |
| ITQQQHIIHTR | BIP231_4/OSIP231_4 | 4IH4      | D         | 0.008963                        | 0.078050495              | -10.12720                     | 3.73150   | 0.3732            |
| KDLTFFPPKN  | BIP0_3             | 3RIZ      | A         | 0.002727                        | 0.052016522              | -17.44970                     | 4.17330   | 0.4173            |
| KELQNTLTYI  | BIP201_1/OSIP201_1 | 3T33      | A         | 0.004482                        | 0.060052748              | -20.93610                     | 7.26090   | 0.7261            |
| KEVHDGRVMV  | BIP101_6/OSIP98_6  | 4XK8      | 7         | 0.029810                        | 0.140766090              | -29.43300                     | 6.74470   | 0.6745            |

| Ligand     | SIP                | PDB_match | PDB Chain | Raw <i>p</i> -values (PepSite2) | BH correction (FDR=0.25) | Average $\Delta G$ (kcal/mol) | Std. Dev. | Std. Err. of Mean |
|------------|--------------------|-----------|-----------|---------------------------------|--------------------------|-------------------------------|-----------|-------------------|
| KGILTVQSAG | OSIP164_1          | 4KA8      | A         | 0.000574                        | 0.043062533              | -40.50060                     | 8.27320   | 0.8273            |
| KHSKCKYAMQ | BIP209_1/OSIP209_1 | 4EET      | B         | 0.049380                        | 0.186600817              | -14.28230                     | 3.64740   | 0.3647            |
| KIAFCLSFGV | BIP218_2/OSIP218_2 | 4NFU      | B         | 0.009454                        | 0.079842866              | -7.04160                      | 3.33890   | 0.3339            |
| KRIRDNILRR | BIP231_6/OSIP231_6 | 2JKI      | B         | 0.070360                        | 0.227844047              | -27.26120                     | 6.73430   | 0.6734            |
| KTGDAYLSSG | BIP34_4/OSIP39_4   | 1XM8      | B         | 0.026150                        | 0.131109139              | -46.63500                     | 4.82680   | 0.4827            |
| LAEDTFGEIS | BIP142_3/OSIP134_3 | 2VTB      | D         | 0.001674                        | 0.046760405              | -48.01700                     | 6.07070   | 0.6071            |
| LDIRFMPERY | OSIP52_5           | 2WTB      | A         | 0.028470                        | 0.137259041              | -33.26080                     | 5.68960   | 0.5690            |
| LDRISKAQSV | BIP139_6           | 4PUT      | A         | 0.000609                        | 0.043062533              | -59.79300                     | 8.22630   | 0.8226            |
| LDSLRSCKLR | BIP90_4            | 3DM0      | A         | 0.020130                        | 0.114259638              | -5.47730                      | 6.15430   | 0.6154            |
| LEKVVENTVA | BIP3_1             | 4BQE      | A         | 0.011410                        | 0.086777945              | -27.05020                     | 6.28010   | 0.6280            |
| LLTSYELSCV | BIP231_3/OSIP231_3 | 4PYH      | A         | 0.004998                        | 0.062359661              | -15.79290                     | 3.82530   | 0.3825            |
| LNHHCRFSGK | BIP243_2/OSIP243_2 | 5E4W      | D         | 0.035250                        | 0.154436627              | -10.30840                     | 3.00680   | 0.3007            |
| LNKICIFFST | BIP154_5/OSIP145_5 | 2O01      | A         | 0.000976                        | 0.043653769              | -38.41440                     | 4.16640   | 0.4166            |
| LRSMAACFAY | BIP89_6            | 5I32      | A         | 0.002063                        | 0.048706951              | -21.79080                     | 3.72030   | 0.3720            |
| LSQRIMPLVI | BIP208_2/OSIP208_2 | 4L0Q      | A         | 0.004319                        | 0.059352533              | -49.29710                     | 5.96190   | 0.5962            |
| MKKEDIGRRF | BIP38_2/OSIP43_2   | 3CQR      | B         | 0.039490                        | 0.164618986              | -17.09600                     | 5.79540   | 0.5795            |
| MLLSHLFASL | BIP50_3            | 2J3I      | B         | 0.066400                        | 0.220555451              | -26.87000                     | 5.49520   | 0.5495            |
| NFHLPQP    | BIP171_2/OSIP158_2 | 2Q4E      | B         | 0.000497                        | 0.043062533              | 1.04790                       | 3.12320   | 0.3123            |
| NLCQAYIVLH | BIP124_5/OSIP115_5 | 5FDN      | A         | 0.031000                        | 0.143811587              | -15.29500                     | 3.20230   | 0.3202            |
| NTLKHNITLE | BIP222_1/OSIP222_1 | 5KOR      | A         | 0.006225                        | 0.067472018              | -33.55820                     | 5.48700   | 0.5487            |
| NTYLPVSYR  | BIP244_9/OSIP244_9 | 1XJ5      | C         | 0.005177                        | 0.063126435              | -15.36600                     | 6.87130   | 0.6871            |
| PTIVPDCLSK | BIP235_4/OSIP235_4 | 5GIJ      | B         | 0.001978                        | 0.048277539              | -14.58880                     | 5.35260   | 0.5353            |
| PVYRQMAQFT | BIP90_3            | 1T1H      | A         | 0.005057                        | 0.062607232              | -34.32460                     | 7.07880   | 0.7079            |
| QIKPQRT    | BIP89_4            | 5GZZ      | C         | 0.001022                        | 0.043822401              | -18.59600                     | 5.54900   | 0.5549            |
| QLCPSLNWGT | BIP31_1            | 2YIJ      | A         | 0.041510                        | 0.169276762              | -26.04760                     | 4.16530   | 0.4165            |
| QLPFLITDSN | BIP22_1/OSIP25_1   | 3OGK      | F         | 0.003555                        | 0.055820995              | -8.46930                      | 7.72580   | 0.7726            |
| QSFSVQLTTE | BIP62_3/OSIP58_3   | 4Z61      | A         | 0.028800                        | 0.138130201              | 11.37230                      | 5.55480   | 0.5555            |
| RCFPCHPS   | BIP24_1            | 1RP0      | A         | 0.004242                        | 0.059034087              | -30.52810                     | 5.10340   | 0.5103            |
| REESQQTKWV | BIP210_3/OSIP210_3 | 2VCE      | A         | 0.057440                        | 0.203277565              | -17.08090                     | 5.95410   | 0.5954            |
| REWMVTPFVK | BIP239_5/OSIP239_5 | 2CDQ      | B         | 0.008712                        | 0.077115047              | -3.47460                      | 3.65290   | 0.3653            |
| RGEEQIFWCQ | BIP227_1/OSIP227_1 | 4O7G      | A         | 0.005910                        | 0.066195474              | -22.46280                     | 4.09960   | 0.4100            |

| Ligand     | SIP                | PDB_match | PDB Chain | Raw p-values (PepSite2) | BH correction (FDR=0.25) | Average $\Delta G$ (kcal/mol) | Std. Dev. | Std. Err. of Mean |
|------------|--------------------|-----------|-----------|-------------------------|--------------------------|-------------------------------|-----------|-------------------|
| RHFLEQSRLP | BIP89_5            | 5JO2      | B         | 0.036180                | 0.156730397              | -13.78640                     | 2.74220   | 0.2742            |
| RIFNPFRIK  | BIP44_5/OSIP49_5   | 4QEO      | A         | 0.005177                | 0.063126435              | -34.32050                     | 5.52370   | 0.5524            |
| RIWSLQLKYT | BIP235_1/OSIP235_1 | 3H7R      | A         | 0.025510                | 0.129363564              | -68.46480                     | 6.11110   | 0.6111            |
| RKRRNNFSCS | BIP142_4/OSIP134_4 | 4N0G      | B         | 0.056720                | 0.201827368              | -3.93630                      | 4.66860   | 0.4669            |
| RLQHHAESLP | BIP208_6/OSIP208_6 | 1N7G      | B         | 0.034070                | 0.151535625              | -10.33770                     | 3.51080   | 0.3511            |
| RPGLRPNGPS | OSIP77_2           | 1WE9      | A         | 0.001697                | 0.046881324              | -19.93050                     | 5.21160   | 0.5212            |
| RQFKALYQYI | BIP4_2/OSIP5_2     | 5HH7      | A         | 0.022670                | 0.121560274              | -54.42800                     | 6.81270   | 0.6813            |
| RRKSTNQMGL | BIP210_2/OSIP210_2 | 4TNM      | A         | 0.001552                | 0.046163729              | -29.94440                     | 8.55490   | 0.8555            |
| RRYRFPNSCL | BIP226_4/OSIP226_4 | 5HTR      | A         | 0.028290                | 0.136803225              | -31.41360                     | 4.94000   | 0.4940            |
| RYCMRLMMLN | BIP86_6            | 3PYA      | A         | 0.000612                | 0.043062533              | -40.24270                     | 7.83410   | 0.7834            |
| SDLQKDSWVQ | BIP90_3            | 4E2Q      | C         | 0.003335                | 0.054807220              | -7.11210                      | 3.20690   | 0.3207            |
| SFPNSNSGKV | BIP31_5            | 2FGE      | A         | 0.003409                | 0.055150462              | -1.52640                      | 5.57090   | 0.5571            |
| SGLSNTALAR | BIP229_2/OSIP229_2 | 2Q3O      | B         | 0.004753                | 0.061280118              | -35.22620                     | 4.54440   | 0.4544            |
| SILFFPLCKF | BIP171_6/OSIP158_6 | 5KSD      | B         | 0.000252                | 0.043062533              | -23.31720                     | 4.25180   | 0.4252            |
| SISKACERIP | OSIP4_4            | 2Q4X      | B         | 0.000122                | 0.043062533              | -56.71780                     | 9.91560   | 0.9916            |
| SLISVGLTKN | BIP224_3/OSIP224_3 | 2G5W      | B         | 0.009518                | 0.080067059              | -48.92090                     | 5.36950   | 0.5370            |
| SLLPFSLTDF | BIP237_2/OSIP237_2 | 5IGO      | A         | 0.032290                | 0.147101005              | -25.57600                     | 4.95240   | 0.4952            |
| SLQP       | BIP213_1/OSIP213_1 | 5LAL      | B         | 0.000271                | 0.043062533              | -47.26680                     | 6.35810   | 0.6358            |
| SMFFFFLY   | BIP105_2           | 3EI6      | B         | 0.007954                | 0.074310897              | -32.28160                     | 5.69890   | 0.5699            |
| SNLLYLATVT | BIP239_2/OSIP239_2 | 1MVL      | A         | 0.045360                | 0.177952663              | -16.96080                     | 4.23500   | 0.4235            |
| SNRLTMTGSK | BIP154_1/OSIP145_1 | 4NC4      | C         | 0.011760                | 0.087958000              | -36.54840                     | 4.53820   | 0.4538            |
| SRWSLEIAVK | BIP175_4           | 2CF6      | A         | 0.039230                | 0.164012724              | -40.36650                     | 6.85170   | 0.6852            |
| SSDPVNIWKE | BIP235_4/OSIP235_4 | 5GQR      | B         | 0.000358                | 0.043062533              | -22.05720                     | 4.18880   | 0.4189            |
| SVITYPSCTQ | BIP209_2/OSIP209_2 | 2ZFD      | A         | 0.033850                | 0.151003875              | -43.33060                     | 5.95220   | 0.5952            |
| TFEQYWLPLL | OSIP51_2           | 4A0H      | A         | 0.001652                | 0.046648252              | -46.96320                     | 5.50460   | 0.5505            |
| TFQRNYECAS | BIP236_3/OSIP236_3 | 4N7Q      | A         | 0.003182                | 0.054111335              | -19.41610                     | 4.24450   | 0.4244            |
| TLVATPRCVS | BIP97_6            | 4QQR      | B         | 0.034690                | 0.153090811              | -40.88980                     | 4.55950   | 0.4559            |
| TQSVPTCKS  | BIP231_2/OSIP231_2 | 2P1N      | B         | 0.001471                | 0.045756756              | -31.13340                     | 7.76680   | 0.7767            |
| TRCITCHLRS | BIP106_6           | 4Q75      | B         | 0.046460                | 0.180324403              | -13.12610                     | 7.66320   | 0.7663            |
| TTDKLIPEHM | BIP154_1/OSIP145_1 | 4DNU      | A         | 0.002210                | 0.049456892              | -4.62690                      | 5.00830   | 0.5008            |
| VATRQSPRVP | BIP122_2           | 3VEM      | C         | 0.035310                | 0.154590507              | -14.16080                     | 3.56960   | 0.3570            |

| Ligand     | SIP                | PDB_match | PDB Chain | Raw <i>p</i> -values (PepSite2) | BH correction (FDR=0.25) | Average $\Delta G$ (kcal/mol) | Std. Dev. | Std. Err. of Mean |
|------------|--------------------|-----------|-----------|---------------------------------|--------------------------|-------------------------------|-----------|-------------------|
| VFSYFMDNKR | BIP224_2/OSIP224_2 | 2VY2      | A         | 0.027020                        | 0.133442025              | -25.28370                     | 4.49340   | 0.4493            |
| VGIVPRQKKV | OSIP70_3           | 1XQ1      | A         | 0.002532                        | 0.051075564              | -10.24690                     | 3.33670   | 0.3337            |
| VKSPVPSRTK | BIP44_5/OSIP49_5   | 4XAE      | A         | 0.018780                        | 0.110280281              | -39.76020                     | 6.15190   | 0.6152            |
| VLVNANLDVE | BIP228_1/OSIP228_1 | 2G0Q      | A         | 0.008121                        | 0.074908671              | -14.50460                     | 7.74300   | 0.7743            |
| VMGPFSGPSE | OSIP168_1          | 4EQ4      | A         | 0.049690                        | 0.187261714              | -22.56180                     | 5.99490   | 0.5995            |
| VNGFSLNLSK | OSIP114_6          | 1GCC      | A         | 0.058450                        | 0.205260426              | -39.87140                     | 4.59500   | 0.4595            |
| VQEKVITSSL | OSIP50_2           | 5A5K      | S         | 0.025430                        | 0.129157373              | -26.01160                     | 4.40630   | 0.4406            |
| VSLVTIPNNN | OSIP108_3          | 5HAD      | A         | 0.001466                        | 0.045740500              | -11.95970                     | 5.68870   | 0.5689            |
| VVFGGKMLNC | BIP0_5             | 4TJV      | A         | 0.072140                        | 0.231072809              | -2.25840                      | 3.07840   | 0.3078            |
| VWINQILEQH | BIP214_1/OSIP214_1 | 1YHY      | A         | 0.002668                        | 0.051725656              | 2.08000                       | 3.72570   | 0.3726            |
| YPVLDAVEGA | BIP47_6            | 3FY4      | C         | 0.000136                        | 0.043062533              | -28.64810                     | 5.36340   | 0.5363            |
