# Supplementary material for: Large-scale docking predicts that sORF-encoded peptides may function through protein-peptide interactions in Arabidopsis thaliana
Source: PubMed Central journal article supplement (PMC6188750; doi:10.1371/journal.pone.0205179), 2018-10-15
Supplement: pone.0205179.s007.pdf [file pone.0205179.s007.pdf]

| Peptide with position     | Sequence   | PDB match | Other chain                        | Protein classification         | Protein stoichiometry | $\Delta G$ (kcal/ mol) | raw <i>p</i> -values (PepSite2) | Peptide binding residues on protein-peptide model (PDB)                                                           |
|---------------------------|------------|-----------|------------------------------------|--------------------------------|-----------------------|------------------------|---------------------------------|-------------------------------------------------------------------------------------------------------------------|
| BIP44_5/ OSIP49_5;21-30   | RIFNFPFRIK | 4QEO(A)   | P (substrate H3 peptide)           | Transcription/ DNA             | Monomer               | -34.320500             | 0.005177                        | 418, 420, 482, 485, 495, 496, 497, 498, 499, 534, 560, 562, 591, 592, 593, 594, 595, 596, 599, 600, 601, 602, 603 |
| BIP47_6;15-24             | YPVLDAVEGA | 3FY4(C)   | A                                  | Lyase                          | Monomer               | -28.648100             | 0.000136                        | 162, 244, 245, 246, 247, 257, 292, 293, 301, 363, 364, 365, 368, 408, 415, 417, 420, 422                          |
| BIP237_2/ OSIP237_2;5-14  | SLLPFLSTDF | 5IGO(A)   | U (Tribbles Homolog 1 peptide)     | Hydrolase/ Peptide             | Monomer               | -25.576000             | 0.032290                        | 373, 375, 390, 391, 422, 423, 441, 465, 467, 526, 528, 549, 550, 551, 554, 568, 592, 593, 594, 595, 596, 646      |
| OSIP51_2;37-46            | TFEQYWLPLL | 4A0H(A)   | B                                  | Transferase                    | Homo 2-mer - A2       | -46.963200             | 0.001652                        | 326, 328, 331, 332, 369, 370, 473, 488, 489, 581, 587, 617, 618, 644, 761, 775, 777, 778                          |
| BIP103_3;28-37            | FFDDVKSRRL | 2XQR(A)   | B                                  | Hydrolase/ Inhibitor           | Hetero 2-mer - AB     | -29.553100             | 0.004392                        | 20, 47, 48, 49, 50, 79, 80, 82, 101, 105, 107, 145, 146, 148, 203, 239, 242, 279                                  |
| BIP208_6/ OSIP208_6;24-33 | RLQHHAESLP | 1N7G(B)   | A                                  | Lyase                          | Homo 4-mer - A4       | -10.337700             | 0.034070                        | 130, 134, 135, 168, 179, 180, 181, 187, 188, 190, 191, 193, 194, 195                                              |
| BIP142_4/ OSIP134_4;14-23 | RKRRNNFSCS | 4N0G(B)   | D                                  | Hydrolase/ Receptor            | Hetero 2-mer - AB     | -3.936300              | 0.056720                        | 262, 276, 277, 278, 279, 280, 281, 282, 286, 287, 288                                                             |
| BIP209_2/ OSIP209_2;12-21 | SVITYPSCTQ | 2ZFD(A)   | B                                  | Signaling protein/ Transferase | Hetero 2-mer - AB     | -43.330600             | 0.033850                        | 76, 77, 78, 85, 86, 89, 130, 131, 133, 139, 144, 147, 148, 151, 154, 171, 172, 175, 183, 191, 198, 201            |
| BIP22_1/ OSIP25_1;19-28   | QLPFLITDSN | 3OGK(F)   | S (JAZ1 incomplete degron peptide) | Protein binding                | Hetero 16-mer - A8B8  | -8.469300              | 0.003555                        | 85, 89, 90, 91, 348, 350, 351, 386, 411, 412, 413, 414, 442, 444, 469, 472, 496, 521, 564                         |
| BIP229_2/ OSIP229_2;10-19 | DLNQPKMYKF | 2XCM(F)   | B                                  | Chaperone/ Protein binding     | Hetero 3-mer - ABC    | -19.530600             | 0.024810                        | 158, 159, 160, 161, 162, 163, 164, 165, 166, 179, 180, 181, 185, 187, 194, 204, 207, 208, 210, 211, 212, 213, 221 |
| BIP231_6/ OSIP231_6;18-27 | ILRRICILIT | 4A0G(A)   | B                                  | Transferase                    | Homo 2-mer - A2       | -50.443500             | 0.002503                        | 324, 325, 326, 327, 328, 369, 370, 473, 476, 481, 488, 489, 494, 587, 775, 776, 777, 778, 782                     |
| BIP244_1/ OSIP244_1;33-42 | IFLFFWFHAL | 4N0G(D)   | B                                  | Hydrolase/ Receptor            | Hetero 2-mer - AB     | -39.596300             | 0.029950                        | 70, 71, 72, 73, 74, 98, 99, 100, 101, 132, 135, 136, 139, 140, 142, 143, 144, 146, 147, 149, 150                  |
| BIP244_9/ OSIP244_9;2-11  | NTYLPIVSYR | 1XJ5(C)   | B                                  | Transferase                    | Homo 4-mer - A4       | -15.366000             | 0.005177                        | 239, 264, 265, 266, 267, 268, 272, 273, 274, 317, 318, 320, 321, 322, 323, 324, 325                               |
| OSIP50_2;34-43            | VQEKVITSSL | 5A5K(S)   | I                                  | Transferase                    | Homo 6-mer - A6       | -26.011600             | 0.025430                        | 9, 11, 12, 13, 14, 15, 36, 37, 38, 41, 55, 112, 116, 119, 120, 124, 125, 128, 130, 179                            |
| BIP243_2/ OSIP243_2;19-28 | LNHHCRFSGK | 5E4W(D)   | A                                  | Transport protein              | Hetero 2-mer - AB     | -10.308400             | 0.035250                        | 267, 268, 269, 270, 271, 272, 291, 292, 293, 294, 295, 296, 297, 298                                              |
