# Supplementary material for: Large-scale docking predicts that sORF-encoded peptides may function through protein-peptide interactions in Arabidopsis thaliana
Source: PubMed Central journal article supplement (PMC6188750; doi:10.1371/journal.pone.0205179), 2018-10-15
Supplement: pone.0205179.s008.pdf [file pone.0205179.s008.pdf]

| Peptide with position    | Sequence   | PDB match | PDB Chain | Classification                 | $\Delta G$ (kcal/mol) | raw p-values (PepSite2) | Peptide binding residues on protein-peptide model (PDB)                                                           | Ligand binding sites (PDBeMotif) / Catalytic site (PDB)                                                                                  | Ligand (Chain)                                                                                                  |
|--------------------------|------------|-----------|-----------|--------------------------------|-----------------------|-------------------------|-------------------------------------------------------------------------------------------------------------------|------------------------------------------------------------------------------------------------------------------------------------------|-----------------------------------------------------------------------------------------------------------------|
| BIP3_1;3-12              | LEKVVENTVA | 4BQE      | A         | Transferase                    | -27.0502              | 0.01141                 | 91, 136, 285, 297, 343, 382, 384, 385, 573, 575, 576, 577, 617, 620, 621, 622, 623, 773, 774, 778, 779            | 575, 617, 620                                                                                                                            | TRIETHYLENE GLYCOL (A)                                                                                          |
| BIP227_1/OSIP227_1;20-29 | RGEEQIFWCQ | 4O7G      | A         | Oxidoreductase                 | -22.4628              | 0.00591                 | 89, 92, 96, 99, 103, 113, 114, 115, 116, 119, 120, 121, 123, 124, 126, 127, 130, 133, 134, 137, 138, 142, 143     | 29, 48, 51, 52, 55, 56, 59, 103, 106, 113, 114, 116, 118, 119, 122, 171, 172, 175, 176, 178, 179                                         | HEME (A)                                                                                                        |
| BIP231_3/OSIP231_3;25-34 | LLTSYELSCV | 4PYH      | A         | Hydrolase                      | -15.7929              | 0.004998                | 87, 88, 133, 135, 136, 139, 165, 166, 167, 277, 278, 279, 280, 281, 314, 328, 330                                 | 307, 314, 330, 167, 278, 314, 332                                                                                                        | ALPHA-D-GLUCOSE (A)                                                                                             |
| BIP89_4;33-42            | QIKPQRT    | 5GZZ      | C         | Ligase/Transferase             | -18.596               | 0.001022                | 8, 9, 32, 33, 34, 35, 36, 37, 38, 39, 40, 41, 42, 43, 45, 55, 111, 204, 205, 206, 207                             | 8, 13, 54, 55, 67                                                                                                                        | GLUTATHIONE (C)                                                                                                 |
| BIP239_2/OSIP239_2;21-30 | SNLLYLATVT | 1MVL      | A         | Lyase                          | -16.9608              | 0.04536                 | 74, 77, 78, 81, 82, 83, 84, 88, 90, 118, 119, 120, 121, 122, 123, 124                                             | 90, 175                                                                                                                                  | -                                                                                                               |
| BIP224_3/OSIP224_3;12-21 | SLISVGLTKN | 2G5W      | B         | Oxidoreductase                 | -48.9209              | 0.009518                | 74, 108, 138, 139, 140, 141, 147, 150, 191, 243, 245, 246, 282, 283, 284, 321, 322, 344, 367, 371                 | 186, 189, 191, 245, 371 / 189, 191, 239, 271                                                                                             | DIEN-1-OIC ACID (B)                                                                                             |
| OSIP108_3;12-21          | VSLVTIPNNN | 5HAD      | A         | Photosynthesis                 | -11.9597              | 0.001466                | 690, 694, 711, 714, 715, 717, 718, 721, 729, 731, 758, 774, 776, 777, 778, 779, 796, 798, 799, 800                | 694, 715, 718, 729, 731                                                                                                                  | ETHYLENE GLYCOL (A)                                                                                             |
| BIP0_3;28-37             | KDLTFFPKN  | 3RIZ/4LSA | A         | Signaling protein              | -17.4497              | 0.002727                | 563, 564, 597, 599, 615, 641, 642, 643, 644, 645, 646, 647, 648, 649, 657, 681, 705, 729                          | 563, 564, 597, 599, 601, 642, 646, 647, 657, 681, 705, 729                                                                               | BRASSINOLIDE (A)                                                                                                |
| BIP175_4;20-29           | SRWSLEIAVK | 2CF6      | A         | Oxidoreductase                 | -40.3665              | 0.03923                 | 53, 58, 60, 113, 114, 115, 116, 117, 119, 121, 122, 123, 273, 274, 275, 276, 277, 295, 296, 297, 298, 299         | 48, 49, 167, 188, 189, 190, 191, 192, 211, 212, 216, 251, 252, 253, 274, 275, 298, 299, 300                                              | NADP (A)                                                                                                        |
| BIP213_1/OSIP213_1;30-39 | SLQP       | 5LAL      | B         | Plant protein                  | -47.2668              | 0.0002713               | 51, 73, 74, 75, 76, 78, 104, 106, 110, 111, 112, 113, 139, 140, 144, 166, 168, 169, 170, 171, 172, 173, 174, 175  | 108, 112, 113, 138, 139, 140, 106, 114, 116, 137, 139, 169, 175                                                                          | GLYCINE (B)                                                                                                     |
| BIP244_8/OSIP244_8;17-26 | HQNQIKEYFI | 4HHD      | B         | Transferase                    | -11.4099              | 0.07966                 | 474, 475, 476, 499, 541, 555, 574, 575, 576, 577, 578, 579, 589, 590, 593, 594, 595, 596, 597, 598, 600, 601, 604 | 478, 480, 487, 511, 512, 513, 515, 516, 525, 528, 529, 532, 542, 544, 556, 558, 571, 573, 575                                            | FLAVIN MONONUCLEOTIDE (B)                                                                                       |
| BIP206_2/OSIP206_2;26-35 | EDVSTRYNIL | 1U1J      | A         | Transferase                    | -49.2971              | 0.05147                 | 437, 439, 490, 567, 607, 647, 649, 650, 671, 672, 674, 699, 700, 701, 732, 733, 734, 736, 737                     | 18, 116, 118, 517, 521, 522, 523, 567                                                                                                    | 5-METHYL-5,6,7,8-TETRAHYDROFOLIC ACID (A)                                                                       |
| BIP44_5/OSIP49_5;21-30   | RIFNPFRIK  | 4QEO      | A         | Transcription/DNA              | -34.3205              | 0.005177                | 418, 420, 482, 485, 495, 496, 497, 498, 499, 534, 560, 562, 591, 592, 593, 594, 595, 596, 599, 600, 601, 602, 603 | 456, 457, 458, 492, 493, 548, 551, 552, 593, 611, 612, 613, 614                                                                          | S-ADENOSYL-L-HOMOCYSTEINE (A)                                                                                   |
| BIP235_4/OSIP235_4;13-22 | EPTIVPDCLS | 2Q4W      | A         | Oxidoreductase                 | -13.905               | 0.03904                 | 41, 45, 46, 49, 50, 52, 65, 67, 92, 93, 94, 111, 113, 139, 141                                                    | 54, 91, 93, 94, 95, 96, 97, 101, 102, 112, 161, 162, 166, 167, 169, 170, 171, 173, 177, 227, 228, 382, 479, 480, 514, 517 / 275, 162, 96 | FLAVIN-ADENINE DINUCLEOTIDE (A)                                                                                 |
| BIP209_1/OSIP209_1;31-40 | KHSKCKYAMQ | 4EET      | B         | Signaling protein flavoprotein | -14.2823              | 0.04938                 | 386, 387, 388, 389, 390, 391, 393, 405, 407, 409, 475, 486, 488                                                   | 392, 394, 401, 425, 426, 427, 429, 430, 439, 442, 443, 446, 456, 458, 468, 470, 472, 485, 486, 487, 489                                  | FLAVIN MONONUCLEOTIDE (B)                                                                                       |
| BIP105_2;29-38           | SMFFFFLY   | 3EI6      | B         | Transferase                    | -32.2816              | 0.007954                | 37, 39, 40, 43, 46, 60, 63, 64, 65, 129, 152, 155, 209, 237, 239, 240, 267, 269, 270, 278, 328, 368               | 37, 39, 63, 64, 127, 128, 129, 152, 205, 209, 237, 240, 267, 269, 270, 278, 364, 404                                                     | (2S,6S)-2-AMINO-6-[[[(3-HYDROXY-2-METHYL-5-[(PHOSPHONOXY)METHYL]PYRIDIN-4-YL)METHYL]AMINO]HEPTANEDIOIC ACID (B) |
| OSIP68_6;38-47           | GIYLYNKCAF | 3R0Q      | G         | Transferase                    | -31.8432              | 0.003906                | 37, 38, 39, 41, 43, 44, 47, 48, 143, 145, 147, 151, 152, 239, 321, 322, 323, 325, 356, 383                        | 36, 39, 45, 48, 54, 78, 79, 99, 100, 101, 126, 127, 128, 129, 143, 154, 157                                                              | S-ADENOSYL-L-HOMOCYSTEINE(G)                                                                                    |
| OSIP51_2;37-46           | TFEQYWLPLL | 4A0H      | A         | Transferase                    | -46.9632              | 0.001652                | 326, 328, 331, 332, 369, 370, 473, 488, 489, 581, 587, 617, 618, 644, 761, 775, 777, 778                          | 326, 369, 370, 473, 587, 775, 777                                                                                                        | 7-KETO-8-AMINOPELARGONIC ACID (A)                                                                               |
| BIP229_2/OSIP229_2;32-41 | SGLSNTALAR | 2Q3O      | B         | Oxidoreductase                 | -35.2262              | 0.004753                | 30, 31, 32, 33, 64, 74, 108, 138, 139, 141, 150, 186, 189, 191, 245, 343, 344, 371                                | 33, 35, 186, 189, 191, 239, 244, 271                                                                                                     | -                                                                                                               |

| Peptide with position    | Sequence    | PDB match | PDB Chain | Classification      | $\Delta G$ (kcal/mol) | raw p-values (PepSite2) | Peptide binding residues on protein-peptide model (PDB)                                                                     | Ligand binding sites (PDBeMotif) / Catalytic site (PDB)                                                                                          | Ligand (Chain)                                                                                                 |
|--------------------------|-------------|-----------|-----------|---------------------|-----------------------|-------------------------|-----------------------------------------------------------------------------------------------------------------------------|--------------------------------------------------------------------------------------------------------------------------------------------------|----------------------------------------------------------------------------------------------------------------|
| BIP235_1/OSIP235_1;15-24 | RIWSLQLKYT  | 3H7R      | A         | Oxidoreductase      | -68.4648              | 0.02551                 | 24, 25, 47, 48, 79, 111, 121, 122, 178, 202, 203, 207, 208, 209, 210, 286, 287, 288, 289, 291, 292                          | 22, 23, 24, 43, 48, 77, 110, 154, 155, 176, 202, 203, 204, 205, 206, 207, 208, 214, 235, 250, 251, 252, 53, 254, 258, 261, 262 / 77, 43, 48, 110 | NADP (A)                                                                                                       |
| BIP86_6;6-15             | RYCMRLMMLN  | 3PYA      | A         | Isomerase           | -40.2427              | 0.000612                | 205, 206, 208, 209, 241, 245, 248, 260, 263, 264, 287, 369, 377, 379, 380, 412, 415, 417, 418, 463, 464, 508                | 208, 209, 245, 260, 263, 329, 333, 369, 412, 417, 463, 464, 505                                                                                  | S-[(2E,6E,10E)-14-(DIMETHYLAMINO)-3,7,11-TRIMETHYLTETRADECA-2,6,10-TRIEN-1-YL] TRIHYDROGEN THIODIPHOSPHATE (A) |
| BIP103_3;28-37           | FFDDVKSRRRL | 2XQR      | A         | Hydrolase/Inhibitor | -29.5531              | 0.004392                | 20, 47, 48, 49, 50, 79, 80, 82, 101, 105, 107, 145, 146, 148, 203, 239, 242, 279                                            | 22, 23, 39, 47, 82, 83, 148, 149, 203, 204, 279                                                                                                  | FRUCTOSE(A)                                                                                                    |
| BIP142_3_OSIP134_3;10-19 | LAEDTFGEIS  | 2VTB      | D         | Lyase/DNA           | -48.017               | 0.001674                | 193, 194, 195, 198, 199, 273, 317, 320, 321, 324, 328, 434, 441, 443, 444, 446                                              | 325, 328, 391                                                                                                                                    | -                                                                                                              |
| BIP222_1/OSIP222_1;37-46 | NTLKHNITL   | 5KOR      | A         | Transferase         | -33.5582              | 0.006225                | 180, 181, 182, 183, 184, 271, 300, 301, 366, 368, 481, 483, 501, 523, 524, 551, 552, 553                                    | 181, 183, 184, 366, 416, 417, 418, 459, 463, 466, 482, 483, 484                                                                                  | GUANOSINE-5'-DIPHOSPHATE (A)                                                                                   |
| BIP214_1/OSIP214_1;63-72 | VWINQILEQH  | 1YHY      | A         | Transferase         | 2.08                  | 0.002668                | 177, 181, 184, 377, 485, 486, 489, 507, 508, 509, 510, 511, 512, 513, 568, 570, 571, 572, 574, 575, 582, 583, 584, 585, 586 | 485, 486, 487, 488, 513, 537, 538, 539, 540, 565, 567, 568, 569, 570 / 121, 144, 123, 167, 485, 513, 570, 571, 207, 206, 199, 198, 511           | ETHYL DIHYDROGEN DIPHOSPHATE & METSULFURON METHYL & FAD (A)                                                    |
| BIP47_6;15-24            | YPVLDAVEGA  | 3FY4      | C         | Lyase               | -28.6481              | 0.0001355               | 162, 244, 245, 246, 247, 257, 292, 293, 301, 363, 364, 365, 368, 408, 415, 417, 420, 422                                    | 298, 301, 364                                                                                                                                    | -                                                                                                              |
| BIP44_5/OSIP49_5;39-48   | VKSPVPSRTK  | 4XAE      | A         | Oxidoreductase      | -39.7602              | 0.01878                 | 138, 140, 147, 153, 214, 216, 232, 233, 234, 235, 236, 237, 238, 278, 282, 309, 333, 339, 341, 342, 343                     | 235, 237, 293                                                                                                                                    | SODIUM ION (A)                                                                                                 |
| BIP34_4/OSIP39_4;2-11    | KTGDAYLSSG  | 1XM8      | B         | Hydrolase           | -46.635               | 0.02615                 | 12, 54, 55, 56, 57, 58, 59, 60, 61, 64, 83, 84, 85, 112, 113, 131, 134, 138, 139, 140, 142, 143, 169, 171, 248              | 134, 137, 138, 140, 171, 248, 251, 54, 56, 112 / 58                                                                                              | ACETIC ACID & Zn (B)                                                                                           |
| BIP212_2/OSIP212_2;31-40 | FAVEFQVRK   | 5D79      | B         | Oxidoreductase      | -49.8954              | 0.004563                | 113, 174, 175, 176, 291, 299, 301, 344, 345, 346, 359, 361, 362, 363, 395, 397, 399, 428, 530, 432                          | 106, 107, 108, 109, 110, 111, 112, 113, 117, 130, 149, 174, 177, 178, 180, 181, 182, 187, 188, 233, 234, 237, 238, 239, 470, 472, 473, 474       | FLAVIN-ADENINE DINUCLEOTIDE (B)                                                                                |
| OSIP94_4;15-24           | DEYDCWSS    | 2HJ3      | A         | Oxidoreductase      | -37.8687              | 0.01852                 | 11, 12, 15, 16, 17, 19, 20, 23, 86, 89, 90, 91, 93, 95, 96, 98, 99, 102, 105, 106, 107                                      | 11, 15, 16, 18, 19, 23, 52, 56, 57, 60, 61, 83, 86, 87, 89, 90, 93, 95, 98, 103, 107                                                             | FLAVIN-ADENINE DINUCLEOTIDE (A)                                                                                |
